# Supplementary material for: Combining hydrophilic and hydrophobic environment sensitive dyes to detect a wide range of cellular polarity
Source: Royal Society of Chemistry journal article supplement (doi:10.1039/c9sc04859f), 2019-11-25
Supplement: c9sc04859f1.pdf [file c9sc04859f1.pdf]

## Supporting Information for

# Combining hydrophilic and hydrophobic environment sensitive dyes to detect wide range of cellular polarity

Sang Jun Park,<sup>‡</sup> Vinayak Juvekar,<sup>‡</sup> Jae Hyung Jo and Hwan Myung Kim\*

Department of Energy Systems Research, Ajou University, Suwon 443-749, Korea

Fax: +82-31-219-1615, Email: kimhm@ajou.ac.kr

## Table of Contents

|                                                                                                                                                                                                                                                                                                                                                                                                                                                                                                                                                            | Page |
|------------------------------------------------------------------------------------------------------------------------------------------------------------------------------------------------------------------------------------------------------------------------------------------------------------------------------------------------------------------------------------------------------------------------------------------------------------------------------------------------------------------------------------------------------------|------|
| <b>Synthesis of Dye1, Dye2, Dye3 and RPS-1</b> .....                                                                                                                                                                                                                                                                                                                                                                                                                                                                                                       | S3   |
| <b>Spectroscopic Measurements</b> .....                                                                                                                                                                                                                                                                                                                                                                                                                                                                                                                    | S7   |
| <b>Cell Viability</b> .....                                                                                                                                                                                                                                                                                                                                                                                                                                                                                                                                | S9   |
| <b>Selectivity Assay</b> .....                                                                                                                                                                                                                                                                                                                                                                                                                                                                                                                             | S12  |
| <b>Photostability</b> .....                                                                                                                                                                                                                                                                                                                                                                                                                                                                                                                                | S13  |
| <b>Figure S1.</b> (a) Absorption spectra and (b) fluorescence spectra of <b>Dye2</b> (1 $\mu$ M) in various polar and non-polar solvents. Excitation wavelength was 552 nm.....                                                                                                                                                                                                                                                                                                                                                                            | S7   |
| <b>Figure S2.</b> $^1\text{H}$ NMR spectrum ( $\delta$ 5.2–9.0 region) of <b>Dye1</b> in $\text{CDCl}_3$ , $\text{CDCl}_3:\text{CD}_3\text{OD} = 1:1$ (v/v) and $\text{CD}_3\text{OD}:\text{D}_2\text{O} = 1:1$ (v/v) solvents.....                                                                                                                                                                                                                                                                                                                        | S8   |
| <b>Figure S3.</b> Effect of pH on the (a,c) absorbance and (b,d) fluorescence spectra for (a,b) <b>Dye1</b> and (c,d) <b>Dye2</b> in universal buffer (0.1 M citric acid, 0.1 M $\text{KH}_2\text{PO}_4$ , 0.1 M $\text{Na}_2\text{B}_4\text{O}_7$ , 0.1 M Tris, 0.1 M KCl) at 37 $^\circ\text{C}$ . Excitation wavelength was 552 nm.....                                                                                                                                                                                                                 | S8   |
| <b>Figure S4.</b> Viability of HeLa cells in the presence of polarity probes as measured by using MTT assays. The cells were incubated with 0–20 $\mu\text{M}$ of probes for 2 h.....                                                                                                                                                                                                                                                                                                                                                                      | S9   |
| <b>Figure S5.</b> Co-localization assays with (a) <b>Dye2</b> and (b) LysoTracker Green in HeLa cells. (c) Merged image. Excitation wavelengths were 488 nm (LTG) and 552 nm ( <b>Dye2</b> ) and the corresponding emissions were recorded at 500–540 nm (LTG) and 565–650 nm ( <b>Dye2</b> ), respectively. Scale bars = 20 $\mu\text{m}$ .....                                                                                                                                                                                                           | S9   |
| <b>Figure S6.</b> (a) Absorption spectra and (b) fluorescence spectra of <b>Dye3</b> (3 $\mu\text{M}$ ) in various polar and non-polar solvents. Excitation wavelength was 552 nm.....                                                                                                                                                                                                                                                                                                                                                                     | S10  |
| <b>Figure S7.</b> Effect of pH on the (a) absorbance, (b) fluorescence intensity and (c) fluorescence intensity ratios ( $F_{\text{yellow}}/F_{\text{red}}$ ) for <b>RPS-1</b> in universal buffer (0.1 M citric acid, 0.1 M $\text{KH}_2\text{PO}_4$ , 0.1 M $\text{Na}_2\text{B}_4\text{O}_7$ , 0.1 M Tris, 0.1 M KCl) at 37 $^\circ\text{C}$ . Excitation wavelength was 552 nm.....                                                                                                                                                                    | S11  |
| <b>Figure S8.</b> Fluorescence intensity ratio ( $F_{\text{yellow}}/F_{\text{red}}$ ) of <b>RPS-1</b> (3 $\mu\text{M}$ ) with a variety of substances in PBS buffer (10 mM, pH 7.4) at 37 $^\circ\text{C}$ [(1) control; 200 $\mu\text{M}$ , (2) TBHP, (3) $\text{O}^{2-}$ , (4) $\cdot\text{OH}$ (5) $\cdot\text{O}^t\text{Bu}$ (6) $\text{H}_2\text{O}_2$ , (7) $\text{NO}\cdot$ , (8) $\text{ONOO}^-$ ; 1 mM, (9) Lys, (10) Arg, (11) His, (12) Asp, (13) Glu, (14) glucose, (15) GSH; 1 unit $\text{mL}^{-1}$ , (16) amidase, (17) NTR, (18) ALP, (19) |      |

|                                                                                                                                                                                                                                                                                                                                                                                                                                               |     |
|-----------------------------------------------------------------------------------------------------------------------------------------------------------------------------------------------------------------------------------------------------------------------------------------------------------------------------------------------------------------------------------------------------------------------------------------------|-----|
| CE1, (20) CE2, (21) NQO1. The excitation wavelength was 552 nm.....                                                                                                                                                                                                                                                                                                                                                                           | S12 |
| <b>Figure S9.</b> Photostability assays in HeLa cells labeled with <b>RPS-1</b> (3 $\mu$ M). (a) Fluorescence images of <b>RPS-1</b> before and after irradiation for 60 min. (b) The relative fluorescence intensity as a function of time at 2.00 s intervals for 60 min using <i>xyt</i> mode. Images were acquired using 552 nm excitation and emission windows of 565–585 nm (yellow) and 630–680 nm (red). Scale bars = 50 $\mu$ m..... | S13 |
| <b>Figure S10.</b> $^1\text{H}$ -NMR spectrum (600 MHz) of <b>Dye1</b> in $\text{CDCl}_3$ .....                                                                                                                                                                                                                                                                                                                                               | S14 |
| <b>Figure S11.</b> $^{13}\text{C}$ -NMR spectrum (150 MHz) of <b>Dye1</b> in $\text{CDCl}_3$ .....                                                                                                                                                                                                                                                                                                                                            | S14 |
| <b>Figure S12.</b> HRMS spectrum of <b>Dye1</b> .....                                                                                                                                                                                                                                                                                                                                                                                         | S15 |
| <b>Figure S13.</b> $^1\text{H}$ -NMR spectrum (600 MHz) of <b>Dye2</b> in $\text{CDCl}_3$ .....                                                                                                                                                                                                                                                                                                                                               | S15 |
| <b>Figure S14.</b> $^{13}\text{C}$ -NMR spectrum (150 MHz) of <b>Dye2</b> in $\text{CDCl}_3$ .....                                                                                                                                                                                                                                                                                                                                            | S16 |
| <b>Figure S15.</b> HRMS spectrum of <b>Dye2</b> .....                                                                                                                                                                                                                                                                                                                                                                                         | S16 |
| <b>Figure S16.</b> $^1\text{H}$ -NMR spectrum (600 MHz) of <b>4</b> in $\text{CDCl}_3$ .....                                                                                                                                                                                                                                                                                                                                                  | S17 |
| <b>Figure S17.</b> $^{13}\text{C}$ -NMR spectrum (150 MHz) of <b>4</b> in $\text{CDCl}_3$ .....                                                                                                                                                                                                                                                                                                                                               | S17 |
| <b>Figure S18.</b> $^1\text{H}$ -NMR spectrum (600 MHz) of <b>6</b> in $\text{CDCl}_3$ .....                                                                                                                                                                                                                                                                                                                                                  | S18 |
| <b>Figure S19.</b> $^{13}\text{C}$ -NMR spectrum (150 MHz) of <b>6</b> in $\text{CDCl}_3$ .....                                                                                                                                                                                                                                                                                                                                               | S18 |
| <b>Figure S20.</b> $^1\text{H}$ -NMR spectrum (600 MHz) of <b>7</b> in $\text{CDCl}_3$ .....                                                                                                                                                                                                                                                                                                                                                  | S19 |
| <b>Figure S21.</b> $^{13}\text{C}$ -NMR spectrum (150 MHz) of <b>7</b> in $\text{CDCl}_3$ .....                                                                                                                                                                                                                                                                                                                                               | S19 |
| <b>Figure S22.</b> $^1\text{H}$ -NMR spectrum (600 MHz) of <b>9</b> in $\text{CDCl}_3$ .....                                                                                                                                                                                                                                                                                                                                                  | S20 |
| <b>Figure S23.</b> $^{13}\text{C}$ -NMR spectrum (150 MHz) of <b>9</b> in $\text{CDCl}_3$ .....                                                                                                                                                                                                                                                                                                                                               | S20 |
| <b>Figure S24.</b> $^1\text{H}$ -NMR spectrum (600 MHz) of <b>10</b> in $\text{CDCl}_3$ .....                                                                                                                                                                                                                                                                                                                                                 | S21 |
| <b>Figure S25.</b> $^{13}\text{C}$ -NMR spectrum (150 MHz) of <b>10</b> in $\text{CDCl}_3$ .....                                                                                                                                                                                                                                                                                                                                              | S21 |
| <b>Figure S26.</b> $^1\text{H}$ -NMR spectrum (600 MHz) of <b>11</b> in $\text{CDCl}_3$ .....                                                                                                                                                                                                                                                                                                                                                 | S22 |
| <b>Figure S27.</b> $^{13}\text{C}$ -NMR spectrum (150 MHz) of <b>11</b> in $\text{CDCl}_3$ .....                                                                                                                                                                                                                                                                                                                                              | S22 |
| <b>Figure S28.</b> $^1\text{H}$ -NMR spectrum (600 MHz) of <b>Dye3</b> in DMSO.....                                                                                                                                                                                                                                                                                                                                                           | S23 |
| <b>Figure S29.</b> $^{13}\text{C}$ -NMR spectrum (150 MHz) of <b>Dye3</b> in DMSO.....                                                                                                                                                                                                                                                                                                                                                        | S23 |
| <b>Figure S30.</b> $^1\text{H}$ -NMR spectrum (600 MHz) of <b>RPS-1</b> in $\text{CDCl}_3$ .....                                                                                                                                                                                                                                                                                                                                              | S24 |
| <b>Figure S31.</b> $^{13}\text{C}$ -NMR spectrum (150 MHz) of <b>RPS-1</b> in $\text{CDCl}_3$ .....                                                                                                                                                                                                                                                                                                                                           | S24 |
| <b>Figure S32.</b> HRMS spectrum of <b>RPS-1</b> .....                                                                                                                                                                                                                                                                                                                                                                                        | S25 |
| <b>Scheme S1.</b> Synthesis of <b>Dye1</b> , <b>Dye2</b> , <b>Dye3</b> and <b>RPS-1</b> .....                                                                                                                                                                                                                                                                                                                                                 | S3  |
| <b>Table S1.</b> Photophysical data for <b>Dye1</b> , <b>Dye2</b> in polar solvents.....                                                                                                                                                                                                                                                                                                                                                      | S7  |
| <b>Table S2.</b> Photophysical data for <b>Dye3</b> in various solvents.....                                                                                                                                                                                                                                                                                                                                                                  | S10 |
| <b>Table S3.</b> Photophysical data for <b>RPS-1</b> in various solvents.....                                                                                                                                                                                                                                                                                                                                                                 | S11 |

**Synthesis of Dye1, Dye2, Dye3 and RPS-1.** Compound **1**, **2**, **3**, **5** and **8** were prepared by the literature methods<sup>1-5</sup> and synthesis of **Dye1**, **Dye2**, **Dye3** and **RPS-1** are described below.

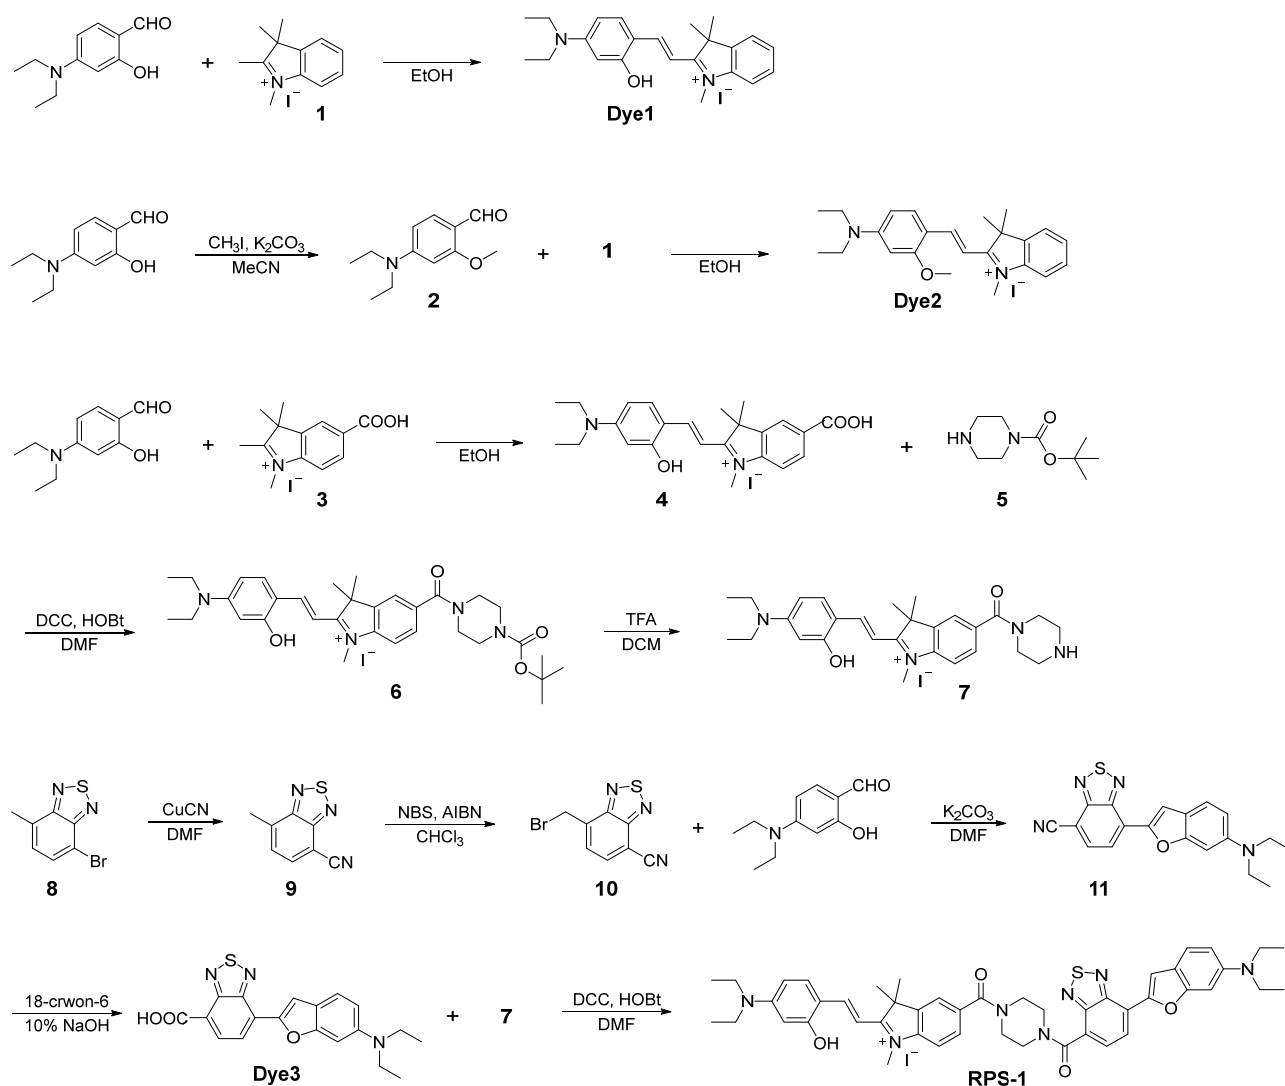

**Scheme S1.** Synthesis of **Dye1**, **Dye2**, **Dye3** and **RPS-1**.

2-(4-(diethylamino)-2-hydroxystyryl)-1,3,3-trimethyl-3H-indol-1-ium iodide (**Dye1**). A mixture of 4-(diethylamino)-2-hydroxybenzaldehyde (100 mg, 0.517 mmol) and **1** (156 mg, 0.517 mmol) in EtOH (20 mL) was refluxed for 12 h. Then reaction mixture was concentrated under reduced pressure and purified with column chromatography (CHCl<sub>3</sub>/MeOH = 9:1) to obtain **Dye1** (145 mg) as a dark greenish semi-solid. Yield: 59 %; <sup>1</sup>H NMR (CDCl<sub>3</sub>, 600 MHz): δ (ppm) 7.16 (t, *J* = 8.3 Hz, 1H), 7.07 (d, *J* = 6.2 Hz, 1H), 6.85 (d, *J* = 8.3 Hz, 1H), 6.82 (t, *J* = 7.9 Hz, 1H), 6.74 (d, *J* = 10.3 Hz, 1H), 6.52 (d, *J* = 7.6 Hz, 1H), 6.13 (dd, *J* = 8.3, 2.8 Hz, 1H), 6.05 (d, *J* = 2.8 Hz, 1H), 5.37 (d, *J* = 10.3 Hz, 1H), 3.26 (q, *J* = 7.1 Hz, 4H), 2.74 (s, 3H), 1.32 (s, 3H), 1.14 (s, 3H), 1.10 (t, *J* = 7.2 Hz, 6H); <sup>13</sup>C NMR (CDCl<sub>3</sub>, 150 MHz): δ (ppm) 156.17, 149.39, 148.63, 137.35, 129.40, 127.58, 127.47, 121.61, 118.89, 113.53, 107.79, 106.83, 104.61, 103.50, 97.53, 51.45, 44.42, 29.05, 26.07, 20.21, 12.77; HRMS (ESI<sup>+</sup>): *m/z* found for [C<sub>23</sub>H<sub>29</sub>ON<sub>2</sub>]<sup>+</sup>: 349.2269.

2-(4-(diethylamino)-2-methoxystyryl)-1,3,3-trimethyl-3H-indol-1-ium iodide (**Dye2**). By following synthetic procedure for **Dye1**. **Dye2** was obtained from **1** and **2** as a dark greenish semi-solid. Yield: 61 %;  $^1\text{H}$  NMR ( $\text{CDCl}_3$ , 600 MHz):  $\delta$  (ppm) 8.30 (brs, 1H), 8.05 (brs, 1H), 7.35 (d,  $J = 7.6$  Hz, 1H), 7.31 (t,  $J = 7.6$  Hz, 1H), 7.20-7.26 (m, 2H), 6.98 (d,  $J = 12.4$  Hz, 1H), 6.40 (d,  $J = 9.0$  Hz, 1H), 5.93 (s, 1H), 3.89 (s, 3H), 3.87 (s, 3H), 3.43 (q,  $J = 6.9$  Hz, 4H), 1.60 (s, 6H), 1.14 (t,  $J = 6.9$  Hz, 6H);  $^{13}\text{C}$  NMR ( $\text{CDCl}_3$ , 150 MHz):  $\delta$  (ppm) 178.10, 164.17, 155.90, 148.07, 141.85, 141.37, 133.44, 128.92, 126.82, 122.68, 113.16, 112.17, 107.73, 102.41, 92.68, 56.58, 50.25, 45.21, 34.63, 29.48, 28.04, 12.88; HRMS ( $\text{ESI}^+$ ):  $m/z$  found for  $[\text{C}_{24}\text{H}_{31}\text{ON}_2]^+$ : 363.2426.

5-carboxy-2-(4-(diethylamino)-2-hydroxystyryl)-1,3,3-trimethyl-3H-indol-1-ium iodide (**4**). By following synthetic procedure for **Dye1**. **4** was obtained from 4-(diethylamino)-2-hydroxybenzaldehyde and **3** as a dark greenish semi-solid. Yield: 58 %;  $^1\text{H}$  NMR ( $\text{CDCl}_3$ , 600 MHz):  $\delta$  (ppm) 8.05 (d,  $J = 8.3$  Hz, 1H), 7.82 (s, 1H), 6.89 (d,  $J = 9.0$  Hz, 1H), 6.79 (d,  $J = 9.6$  Hz, 1H), 6.54 (d,  $J = 8.3$  Hz, 1H), 6.18 (d,  $J = 9.0$  Hz, 1H), 6.06 (s, 1H), 5.37 (d,  $J = 10.3$  Hz, 1H), 3.29 (q,  $J = 7.1$  Hz, 4H), 2.84 (s, 3H), 1.38 (s, 3H), 1.18 (s, 3H), 1.12 (t,  $J = 7.2$  Hz, 6H);  $^{13}\text{C}$  NMR ( $\text{CDCl}_3$ , 150 MHz):  $\delta$  (ppm) 172.13, 155.91, 152.80, 149.74, 137.24, 132.15, 129.83, 127.62, 123.96, 119.26, 112.45, 107.43, 105.78, 104.63, 103.66, 97.34, 50.93, 44.28, 28.71, 25.94, 19.95, 12.74.

5-(4-(tert-butoxycarbonyl)piperazine-1-carbonyl)-2-(4-(diethylamino)-2-hydroxystyryl)-1,3,3-trimethyl-3H-indol-1-ium iodide (**6**). A mixture of **4** (95 mg, 0.182 mmol),  $N,N'$ -dicyclohexylcarbodiimide (DCC, 75 mg, 0.363 mmol) and hydroxybenzotriazole (HOBt, 49 mg, 0.363 mmol) in DMF (10 mL) was stirred for 2 h at room temperature. To this mixture, **5** (68 mg, 0.363 mmol) was added and stirred for 12 h. The solvent was evaporated and the reaction mixture was dissolved in  $\text{CH}_3\text{CN}$  then by-product urea was removed by filtration. The filtrate was concentrated under reduced pressure and purified with column chromatography ( $\text{CHCl}_3/\text{MeOH} = 9:1$ ) to obtain **6** (81 mg) as a dark greenish semi-solid. Yield: 65 %;  $^1\text{H}$  NMR ( $\text{CDCl}_3$ , 600 MHz):  $\delta$  (ppm) 7.24 (dd,  $J = 8.3, 1.4$  Hz, 1H), 7.14 (d,  $J = 1.4$  Hz, 1H), 6.83 (d,  $J = 8.3$  Hz, 1H), 6.72 (d,  $J = 9.6$  Hz, 1H), 6.44 (d,  $J = 8.3$  Hz, 1H), 6.12 (dd,  $J = 8.3, 2.1$  Hz, 1H), 5.98 (d,  $J = 2.1$  Hz, 1H), 5.31 (d,  $J = 9.6$  Hz, 1H), 3.61 (brs, 4H), 3.44 (brs, 4H), 3.24 (q,  $J = 7.3$  Hz, 4H), 2.74 (s, 3H), 1.45 (s, 9H), 1.29 (s, 3H), 1.11 (s, 3H), 1.08 (t,  $J = 6.9$  Hz, 6H);  $^{13}\text{C}$  NMR ( $\text{CDCl}_3$ , 150 MHz):  $\delta$  (ppm) 171.74, 155.86, 154.74, 150.35, 149.49, 137.49, 129.68, 128.15, 127.58, 125.08, 121.76, 112.88, 107.59, 105.71, 104.61, 103.81, 97.41, 80.24, 51.32, 44.39, 34.01, 28.88, 28.47, 26.00, 20.16, 12.75.

2-(4-(diethylamino)-2-hydroxystyryl)-1,3,3-trimethyl-5-(piperazine-1-carbonyl)-3H-indol-1-ium iodide (**7**). A compound **6** (90 mg, 0.131 mmol) was dissolved in a co-solvent of TFA (2 mL) and

DCM (2 mL) then stirred for 12 h at room temperature. Then reaction mixture was washed with 10 % Na<sub>2</sub>CO<sub>3</sub> (10 mL) and brine (10 mL × 2). The organic phase was concentrated under reduced pressure and purified with column chromatography (CHCl<sub>3</sub>/MeOH = 8:2) to obtain **7** (69 mg) as a dark greenish semi-solid. Yield: 90 %; <sup>1</sup>H NMR (CDCl<sub>3</sub>, 600 MHz): δ (ppm) 7.26 (d, *J* = 9.0 Hz, 1H), 7.16 (s, 1H), 6.86 (d, *J* = 8.3 Hz, 1H), 6.75 (d, *J* = 10.3 Hz, 1H), 6.46 (d, *J* = 7.6 Hz, 1H), 6.14 (d, *J* = 9.0 Hz, 1H), 6.00 (s, 1H), 5.32 (d, *J* = 9.6 Hz, 1H), 3.85 (d, *J* = 5.5 Hz, 4H), 3.27 (q, *J* = 7.3 Hz, 4H), 3.08 (s, 4H), 2.77 (s, 3H), 1.30 (s, 3H), 1.13 (s, 3H) 1.10 (t, *J* = 7.2 Hz, 6H); <sup>13</sup>C NMR (CDCl<sub>3</sub>, 150 MHz): δ (ppm) 171.60, 155.88, 150.27, 149.45, 137.47, 129.68, 128.10, 127.58, 125.13, 121.73, 112.91, 107.57, 105.74, 104.62, 103.75, 97.39, 51.35, 45.83, 44.41, 31.02, 28.92, 26.02, 20.18, 12.75.

7-methylbenzo[c][1,2,5]thiadiazole-4-carbonitrile (**9**). To a solution of **8** (1.00 g, 4.38 mmol) in DMF (15 mL) in cylindrical glass pressure tube CuCN (1.23 g, 13.7 mmol) was added and stirring at 150 °C 16 h. After cooling to room temperature aqueous 15 % NH<sub>3</sub> (50 mL) was added and stirred for 1 h. The resulting precipitate was filtrated and washed with DCM. The filtrate was extracted three times with DCM, organic solvent was evaporated, and the product was purified on a silica gel column by using DCM as eluent to obtain **9** (0.57 g) as a white fluffy solid. Yield: 74 %; <sup>1</sup>H NMR (CDCl<sub>3</sub>, 600 MHz): δ (ppm) 7.94 (d, *J* = 6.9 Hz, 1H), 7.44 (d, *J* = 8.3 Hz, 1H), 2.82 (s, 3H); <sup>13</sup>C NMR (CDCl<sub>3</sub>, 150 MHz): δ (ppm) 154.85, 152.90, 138.58, 136.20, 127.46, 115.67, 103.44, 18.56.

7-(bromomethyl)benzo[c][1,2,5]thiadiazole-4-carbonitrile (**10**). To a stirred solution of **9** (1.36 g, 7.78 mmol), 2,2'-azobis(2-methylpropionitrile) (AIBN, 50 mg, 0.304 mmol) and N-bromosuccinimide (NBS, 1.66 g, 9.33 mmol) in dry CHCl<sub>3</sub> (60 mL) added 0.5 mL of 33 % HBr in acetic acid and stirred at 75 °C for 16 h. After reaction completion monitored by TLC, the mixture was dissolved in CHCl<sub>3</sub> (100 mL) and washed with water, organic layer dried over Na<sub>2</sub>SO<sub>4</sub>, filter and concentrated. The crude product was purified by column chromatography (hexane/EA = 9:1) to obtain **10** (1.53 g) as a white solid. Yield: 78 %; <sup>1</sup>H NMR (CDCl<sub>3</sub>, 600 MHz): δ (ppm) 8.02 (d, *J* = 7.6 Hz, 1H), 7.74 (d, *J* = 7.6 Hz, 1H), 4.98 (s, 2H); <sup>13</sup>C NMR (CDCl<sub>3</sub>, 150 MHz): δ (ppm) 153.11, 152.87, 136.70, 135.94, 128.46, 115.09, 106.02, 26.84.

7-(6-(diethylamino)benzofuran-2-yl)benzo[c][1,2,5]thiadiazole-4-carbonitrile (**11**). A mixture of **10** (500 mg, 1.97 mmol), 4-(diethylamino)salicylaldehyde (390 g, 2.02 mmol), and K<sub>2</sub>CO<sub>3</sub> (1.70 g, 12.3 mmol) was stirred in DMF (10 mL) for 16 h at 125 °C. The dark reaction mixture was diluted with water and extracted with EA. The organic solvent was evaporated, and the product was purified on column chromatography (hexane/EA = 9:1) to obtain **11** (151 mg) as a dark violet solid.

Yield: 23 %;  $^1\text{H}$  NMR ( $\text{CDCl}_3$ , 600 MHz):  $\delta$  (ppm) 8.17 (s, 1H), 8.05 (d,  $J = 7.6$  Hz, 1H), 8.02 (d,  $J = 7.6$  Hz, 1H), 7.48 (d,  $J = 8.3$  Hz, 1H), 6.75 (s, 1H), 6.73 (dd,  $J = 8.3, 2.1$  Hz, 1H), 3.45 (q,  $J = 7.1$  Hz, 4H), 1.24 (t,  $J = 7.2$  Hz, 6H);  $^{13}\text{C}$  NMR ( $\text{CDCl}_3$ , 150 MHz):  $\delta$  (ppm) 158.28, 153.88, 150.33, 148.37, 147.80, 136.36, 128.30, 122.81, 121.10, 118.71, 116.17, 113.62, 110.44, 101.74, 92.81, 45.10, 12.71.

7-(6-(diethylamino)benzofuran-2-yl)benzo[*c*][1,2,5]thiadiazole-4-carboxylic acid (**Dye3**). A compound **11** (100 mg, 0.287 mmol) and 18-crown-6 (100 mg, 0.379 mmol) was dissolved in a co-solvent of 10 % NaOH (5 mL) and 1,4-dioxane (5 mL) then stirred for overnight at 100 °C. The solvent was evaporated and the reaction mixture is acidified to pH = 2 with HCl in an ice bath. After diluting with EA (20 mL), the organic phase was concentrated under reduced pressure and purified with column chromatography (DCM/methanol = 94:6) to obtain **9** (31 mg) as a dark purple semi-solid. Yield: 29 %;  $^1\text{H}$  NMR (DMSO, 600 MHz):  $\delta$  (ppm) 8.35 (d,  $J = 6.2$  Hz, 1H), 8.07 (s, 1H), 8.06 (d,  $J = 6.6$  Hz, 1H), 7.51 (d,  $J = 8.2$  Hz, 1H), 6.81 (s, 1H), 6.73 (d,  $J = 9.0$  Hz, 1H), 3.39 (q,  $J = 7.3$  Hz, 4H), 1.11 (t,  $J = 6.9$  Hz, 6H);  $^{13}\text{C}$  NMR ( $\text{CDCl}_3$ , 150 MHz):  $\delta$  (ppm) 165.86, 157.80, 152.95, 151.31, 148.17, 134.40, 126.83, 123.16, 122.01, 121.59, 118.23, 112.10, 110.65, 92.99, 44.78, 12.97.

2-(4-(diethylamino)-2-hydroxystyryl)-5-(4-(7-(6-(diethylamino)benzofuran-2-yl)benzo[*c*][1,2,5]thiadiazole-4-carbonyl)piperazine-1-carbonyl)-1,3,3-trimethyl-3H-indol-1-ium iodide (**RPS-1**). A mixture of **Dye3** (12 mg, 0.028 mmol), DCC (11 mg, 0.55 mmol) and HOBT (7 mg, 0.055 mmol) in DMF (3 mL) was stirred for 2 h at room temperature. To this mixture, **7** (15 mg, 0.028 mmol) was added and stirred for 12 h. The solvent was evaporated and the reaction mixture was dissolved in  $\text{CH}_3\text{CN}$  then by-product urea was removed by filtration. The filtrate was concentrated under reduced pressure and purified with column chromatography ( $\text{CHCl}_3/\text{MeOH} = 9:1$ ) to obtain **RPS-1** (9 mg) as a dark purple semi-solid. Yield: 34 %;  $^1\text{H}$  NMR ( $\text{CDCl}_3$ , 600 MHz):  $\delta$  (ppm) 8.11 (d,  $J = 7.6$  Hz, 1H), 8.05 (s, 1H), 7.76 (d,  $J = 6.9$  Hz, 1H), 7.48 (d,  $J = 9.0$  Hz, 1H), 7.29 (d,  $J = 8.3$  Hz, 1H), 7.48 (d,  $J = 9.0$  Hz, 1H), 6.85 (d,  $J = 9.0$  Hz, 1H), 6.80 (s, 1H), 6.74 (d,  $J = 10.8$  Hz, 1H), 6.72 (d,  $J = 8.4$ , 1H) 6.47 (d,  $J = 8.3$  Hz, 1H), 6.13 (s, 1H), 6.00 (d,  $J = 9.0$  Hz, 1H), 5.32 (d,  $J = 10.3$  Hz, 1H), 3.64–3.96 (m, 8H), 3.44 (q,  $J = 7.1$  Hz, 4H), 3.25 (q,  $J = 7.3$  Hz, 4H), 2.76 (s, 3H), 1.30 (s, 3H), 1.23 (t,  $J = 7.6$  Hz, 6H), 1.13 (s, 3H), 1.09 (t,  $J = 7.5$  Hz, 6H);  $^{13}\text{C}$  NMR ( $\text{CDCl}_3$ , 150 MHz):  $\delta$  (ppm) 171.85, 166.77, 157.66, 155.85, 152.15, 150.87, 150.52, 149.48, 148.52, 147.72, 137.56, 129.71, 129.54, 128.32, 127.58, 126.27, 125.38, 124.69, 122.31, 121.85, 118.82, 112.82, 110.90, 110.11, 107.54, 105.76, 104.61, 103.77, 97.39, 93.33, 51.33, 45.10, 44.41, 29.78, 28.91, 26.02, 22.78, 20.17, 14.22, 12.74 HRMS ( $\text{ESI}^+$ ):  $m/z$  found for  $[\text{C}_{47}\text{H}_{52}\text{O}_4\text{N}_7\text{S}]^+$ : 810.3788.

**Spectroscopic Measurements.** Absorption spectra and fluorescence spectra were recorded with UV-Vis spectrophotometer (S-3100) and fluorescence spectrophotometer (FS-2), respectively. The fluorescence quantum yield was measured with 9,10-diphenylanthracene ( $\Phi = 0.93$  in cyclohexane) as the reference.  $^1\text{H}$  NMR spectra was recorded using 600 MHz NMR spectrometers (JNM-ECZR). Fluorescence images were obtained with spectral confocal microscopes (Leica TCS SP8).

**Table S1.** Photophysical data for **Dye1** and **Dye2** in polar solvents.

| Compound    | Solvent | $\lambda_{\text{max}}^{\text{abs}}$ (nm) <sup>a</sup> | $\lambda_{\text{max}}^{\text{fl}}$ (nm) <sup>b</sup> | $\Phi$ (%) <sup>c</sup> | $\epsilon$ ( $\text{M}^{-1}\text{cm}^{-1}$ ) <sup>d</sup> |
|-------------|---------|-------------------------------------------------------|------------------------------------------------------|-------------------------|-----------------------------------------------------------|
| <b>Dye1</b> | EtOH    | 549                                                   | 573                                                  | 0.55                    | $4.64 \times 10^4$                                        |
|             | MeOH    | 549                                                   | 573                                                  | 0.47                    | $12.12 \times 10^4$                                       |
|             | Water   | 549                                                   | 573                                                  | 0.46                    | $12.55 \times 10^4$                                       |
| <b>Dye2</b> | EtOH    | 556                                                   | 580                                                  | 1.4                     | $8.57 \times 10^4$                                        |
|             | MeOH    | 553                                                   | 579                                                  | 0.73                    | $8.30 \times 10^4$                                        |
|             | Water   | 549                                                   | 579                                                  | 1.1                     | $6.34 \times 10^4$                                        |

a) Maximum absorption wavelength in absorption spectra. b) Maximum emission wavelength in fluorescence spectra. c) Fluorescence quantum yield. d) Molar extinction coefficients.

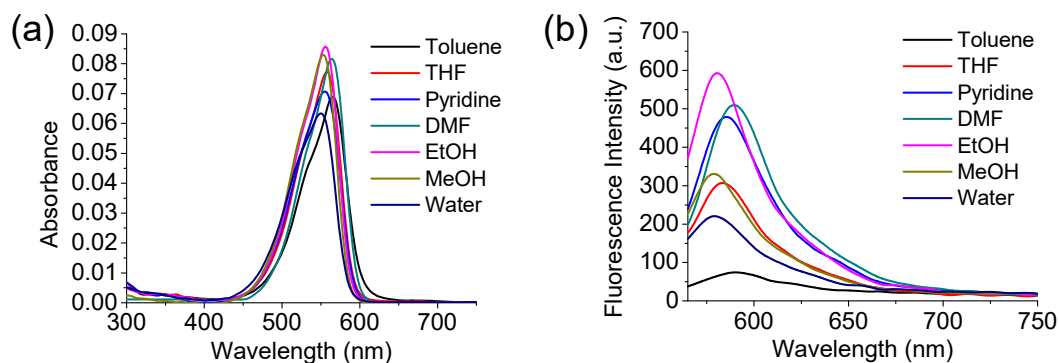

**Figure S1.** (a) Absorption spectra and (b) fluorescence spectra of **Dye2** (1  $\mu\text{M}$ ) in various polar and non-polar solvents. Excitation wavelength was 552 nm.

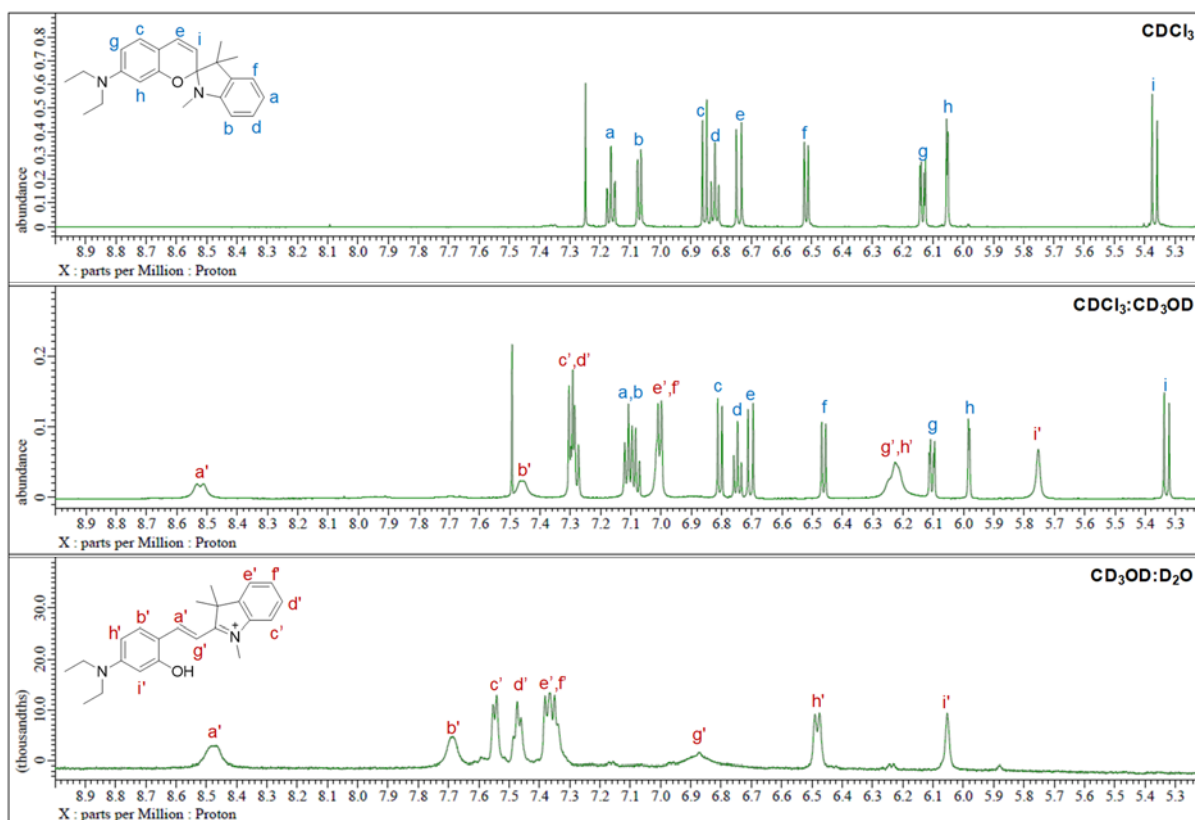

**Figure S2.**  $^1\text{H}$  NMR spectrum ( $\delta$  5.2–9.0 region) of **Dye1** in  $\text{CDCl}_3$ ,  $\text{CDCl}_3:\text{CD}_3\text{OD} = 1:1$  (v/v) and  $\text{CD}_3\text{OD}:\text{D}_2\text{O} = 1:1$  (v/v) solvents.

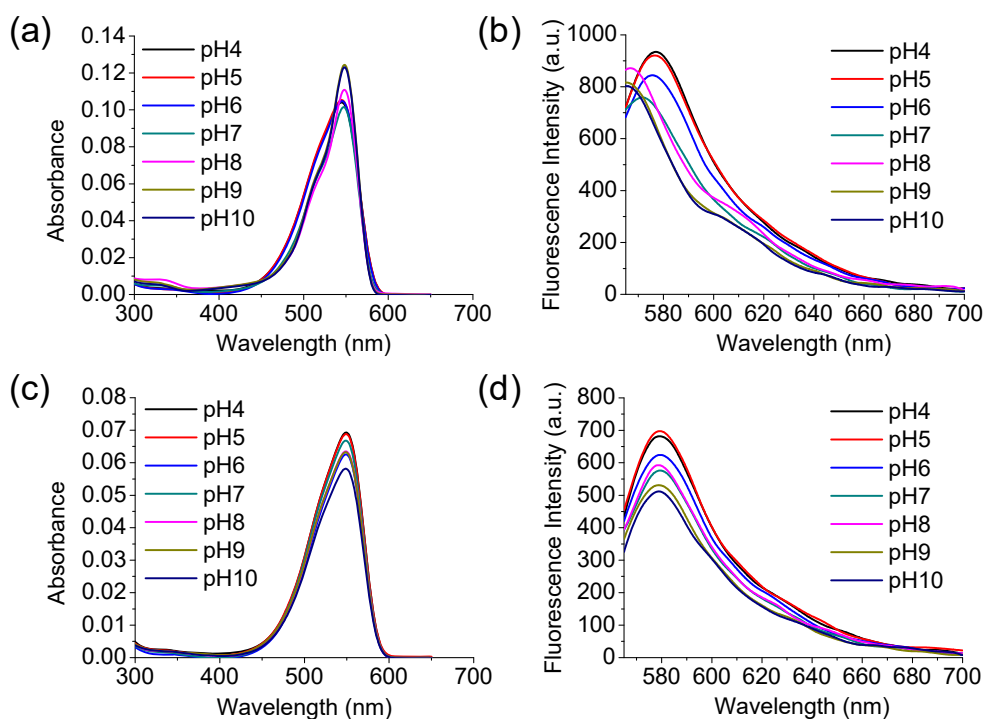

**Figure S3.** Effect of pH on the (a,c) absorbance and (b,d) fluorescence spectra for (a,b) **Dye1** and (c,d) **Dye2** in universal buffer (0.1 M citric acid, 0.1 M  $\text{KH}_2\text{PO}_4$ , 0.1 M  $\text{Na}_2\text{B}_4\text{O}_7$ , 0.1 M Tris, 0.1 M KCl) at 37 °C. Excitation wavelength was 552 nm.



**Cell Viability.** MTT kit (AbCareBio CL) assay was performed to assess the cytotoxicity. HeLa cells were cultured in 96-well plate for 24 h, and then each different concentration of probes was added. After incubation for 2 h, the cultured medium was replaced with serum free medium containing 10 % MTT, and further incubated for 2 h. MTT containing medium was removed and DMSO was added to dissolve the formed formazan precipitate. Absorbance was measured at 600 nm.

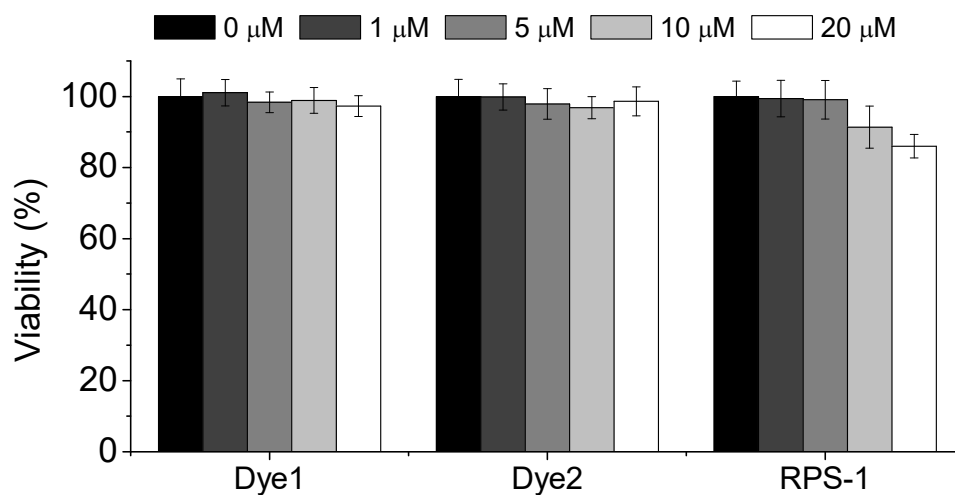

**Figure S4.** Viability of HeLa cells in the presence of polarity probes as measured by using MTT assays. The cells were incubated with 0–20  $\mu\text{M}$  of probes for 2 h.

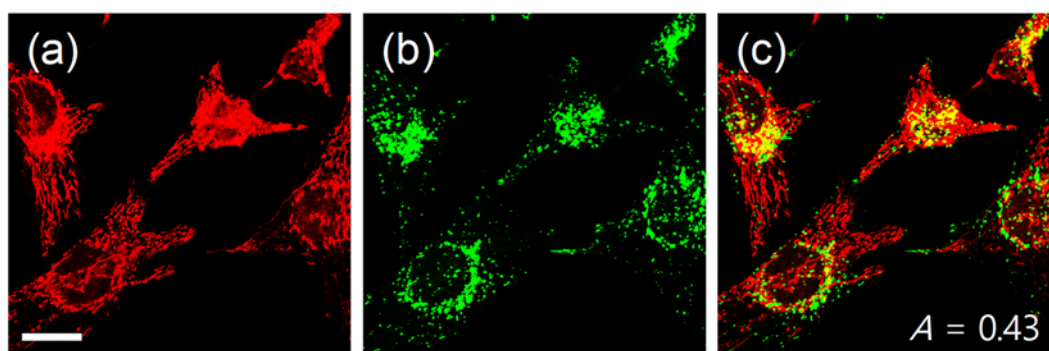

**Figure S5.** Co-localization assays with (a) **Dye2** and (b) LysoTracker Green in HeLa cells. (c) Merged image. Excitation wavelengths were 488 nm (LTG) and 552 nm (**Dye2**) and the corresponding emissions were recorded at 500–540 nm (LTG) and 565–650 nm (**Dye2**), respectively. Scale bars = 20  $\mu\text{m}$ .

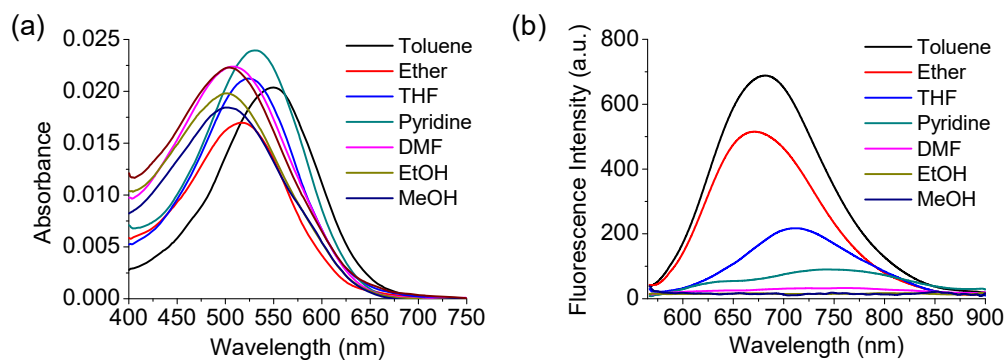

**Figure S6.** (a) Absorption spectra and (b) fluorescence spectra of **Dye3** (3  $\mu\text{M}$ ) in various polar and non-polar solvents. Excitation wavelength was 552 nm.

**Table S2.** Photophysical data for **Dye3** in various solvents.

| Compound    | Solvent  | $\lambda_{\text{max}}^{\text{abs}}$ (nm) <sup>a</sup> | $\lambda_{\text{max}}^{\text{fl}}$ (nm) <sup>b</sup> | $\Phi$ (%) <sup>c</sup> | $\epsilon$ ( $\text{M}^{-1}\text{cm}^{-1}$ ) <sup>d</sup> |
|-------------|----------|-------------------------------------------------------|------------------------------------------------------|-------------------------|-----------------------------------------------------------|
| <b>Dye3</b> | Toluene  | 549                                                   | 681                                                  | 6.4                     | $6.79 \times 10^3$                                        |
|             | Ether    | 515                                                   | 671                                                  | 6.0                     | $5.66 \times 10^3$                                        |
|             | THF      | 524                                                   | 712                                                  | 2.2                     | $7.08 \times 10^3$                                        |
|             | Pyridine | 533                                                   | 742                                                  | 0.81                    | $7.98 \times 10^3$                                        |
|             | DMF      | 510                                                   | 759                                                  | 0.36                    | $7.46 \times 10^3$                                        |
|             | EtOH     | 503                                                   | ND                                                   | ND                      | $6.15 \times 10^3$                                        |
|             | MeOH     | 503                                                   | ND                                                   | ND                      | $7.43 \times 10^3$                                        |

a) Maximum absorption wavelength in absorption spectra. b) Maximum emission wavelength in fluorescence spectra. c) Fluorescence quantum yield. d) Molar extinction coefficients.

**Table S3.** Photophysical data for **RPS-1** in various solvents.

| Solvent  | $\lambda_{\max}^{\text{abs}}$ (nm) <sup>a</sup> | $\lambda_{\max}^{\text{fl}}$ (nm) <sup>b</sup> | $\Phi$ (%) <sup>c</sup> | $\epsilon$ (M <sup>-1</sup> cm <sup>-1</sup> ) <sup>d</sup> | E <sub>T</sub> <sup>Ne</sup> | Ratio <sup>f</sup> |
|----------|-------------------------------------------------|------------------------------------------------|-------------------------|-------------------------------------------------------------|------------------------------|--------------------|
| Toluene  | 512                                             | 651                                            | 17.                     | $3.51 \times 10^3$                                          | 0.099                        | 0.0291             |
| Ether    | 512                                             | 654                                            | 11.                     | $3.49 \times 10^3$                                          | 0.117                        | 0.0331             |
| THF      | 507                                             | 735                                            | 1.5                     | $3.59 \times 10^3$                                          | 0.207                        | 0.106              |
| EA       | 498                                             | 720                                            | 2.0                     | $3.25 \times 10^3$                                          | 0.228                        | 0.123              |
| Pyridine | 516                                             | 763                                            | 1.1                     | $4.45 \times 10^3$                                          | 0.302                        | 0.207              |
| DMF      | 501                                             | 586                                            | 0.49                    | $3.94 \times 10^3$                                          | 0.386                        | 0.390              |
| DMSO     | 505                                             | 588                                            | 0.76                    | $3.57 \times 10^3$                                          | 0.444                        | 0.586              |
| MeCN     | 491                                             | 590                                            | 0.27                    | $3.66 \times 10^3$                                          | 0.46                         | 0.653              |
| 2-PrOH   | 520                                             | 583                                            | 1.1                     | $4.01 \times 10^3$                                          | 0.546                        | 0.909              |
| EtOH     | 520                                             | 580                                            | 0.71                    | $5.62 \times 10^3$                                          | 0.546                        | 1.108              |
| MeOH     | 551                                             | 577                                            | 0.24                    | $1.68 \times 10^4$                                          | 0.762                        | 1.597              |
| Water    | 552                                             | 576                                            | 0.28                    | $3.63 \times 10^4$                                          | 1                            | 2.125              |

a) Maximum absorption wavelength in absorption spectra. b) Maximum emission wavelength in fluorescence spectra. c) Fluorescence quantum yield. d) Molar extinction coefficients. e) Normalized solvent polarity scale. f) Fluorescence emission ratio ( $F_{\text{yellow}}/F_{\text{red}}$ ) in fluorescence spectra.

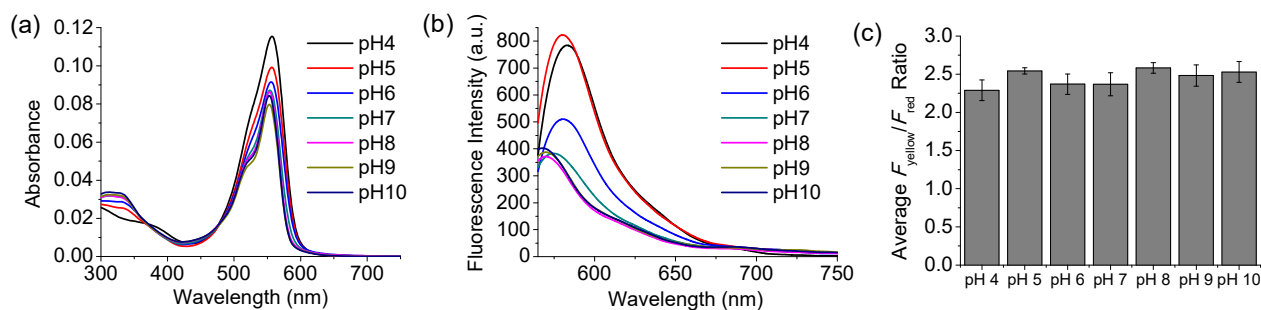

**Figure S7.** Effect of pH on the (a) absorbance, (b) fluorescence spectra and (c) fluorescence intensity ratios ( $F_{\text{yellow}}/F_{\text{red}}$ ) for **RPS-1** in universal buffer (0.1 M citric acid, 0.1 M KH<sub>2</sub>PO<sub>4</sub>, 0.1 M Na<sub>2</sub>B<sub>4</sub>O<sub>7</sub>, 0.1 M Tris, 0.1 M KCl) at 37 °C. Excitation wavelength was 552 nm.

**Selectivity Assay.** Each species (200  $\mu\text{M}$  of ROS and RNS; 1mM of amino acids, glucose and GSH; 1 unit  $\text{mL}^{-1}$  of enzymes) were administered to 3  $\mu\text{M}$  of **RPS-1** in PBS buffer (10 mM, pH 7.4) and the fluorescence spectra were measured as time. Temperature was maintained for 2 h at 37  $^{\circ}\text{C}$ . *tert*-butyl hydroperoxide (TBHP, 416665),  $\text{KO}_2$  (278904), amino acids (LAA21), glucose (G7528), glutathione (GSH, G6013), amidase (A6691), nitroreductase (NTR, N9284), alkaline phosphatase (ALP, P7640), carboxylesterase 1 (CE1, E0287), carboxylesterase 2 (CE2, E0412), quinone reductase (NQO1, D1315) were purchased from Sigma- Aldrich. Hydroxyl radical ( $\cdot\text{OH}$ ) and *tert*-butoxyl radical ( $\cdot\text{O}^t\text{Bu}$ ) were generated from TBHP and  $\text{H}_2\text{O}_2$  by  $\text{FeSO}_4$ . Peroxynitrite ( $\text{ONOO}^-$ ) was prepared following the reported method.<sup>6</sup>

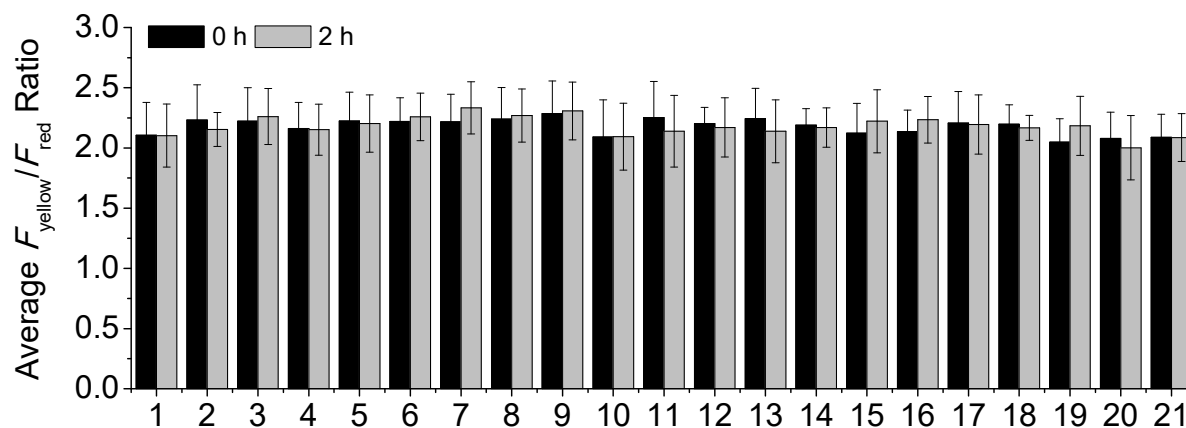

**Figure S8.** Fluorescence intensity ratio ( $F_{\text{yellow}}/F_{\text{red}}$ ) of **RPS-1** (3  $\mu\text{M}$ ) with a variety of substances in PBS buffer (10 mM, pH 7.4) at 37  $^{\circ}\text{C}$  [(1) control; 200  $\mu\text{M}$ , (2) TBHP, (3)  $\text{O}_2^-$ , (4)  $\cdot\text{OH}$  (5)  $\cdot\text{O}^t\text{Bu}$  (6)  $\text{H}_2\text{O}_2$ , (7)  $\text{NO}^\cdot$ , (8)  $\text{ONOO}^-$ ; 1 mM, (9) Lys, (10) Arg, (11) His, (12) Asp, (13) Glu, (14) glucose, (15) GSH; 1 unit  $\text{mL}^{-1}$ , (16) amidase, (17) NTR, (18) ALP, (19) CE1, (20) CE2, (21) NQO1. The excitation wavelength was 552 nm.

**Photostability.** Photostability of **RPS-1** was measured as the variation in fluorescence intensity over time at three designated positions in **RPS-1**-labeled (3  $\mu\text{M}$ ) HeLa cells. Fluorescence intensity was unchanged for 60 min, indicating high photostability.

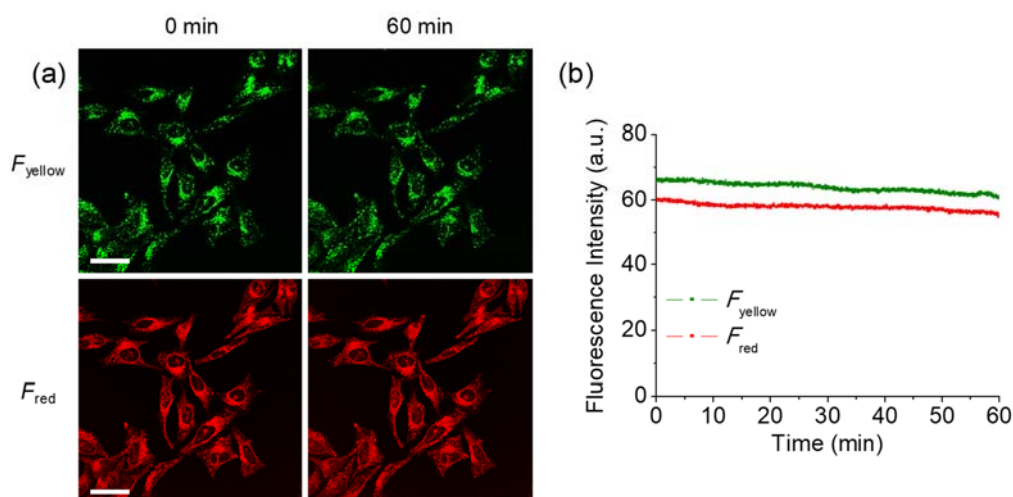

**Figure S9.** Photostability assays in HeLa cells labeled with **RPS-1** (3  $\mu\text{M}$ ). (a) Fluorescence images of **RPS-1** before and after irradiation for 60 min. (b) The relative fluorescence intensity as a function of time at 2.00 s intervals for 60 min using *xyt* mode. Images were acquired using 552 nm excitation and emission windows of 565–585 nm (yellow) and 630–680 nm (red). Scale bars = 50  $\mu\text{m}$ .

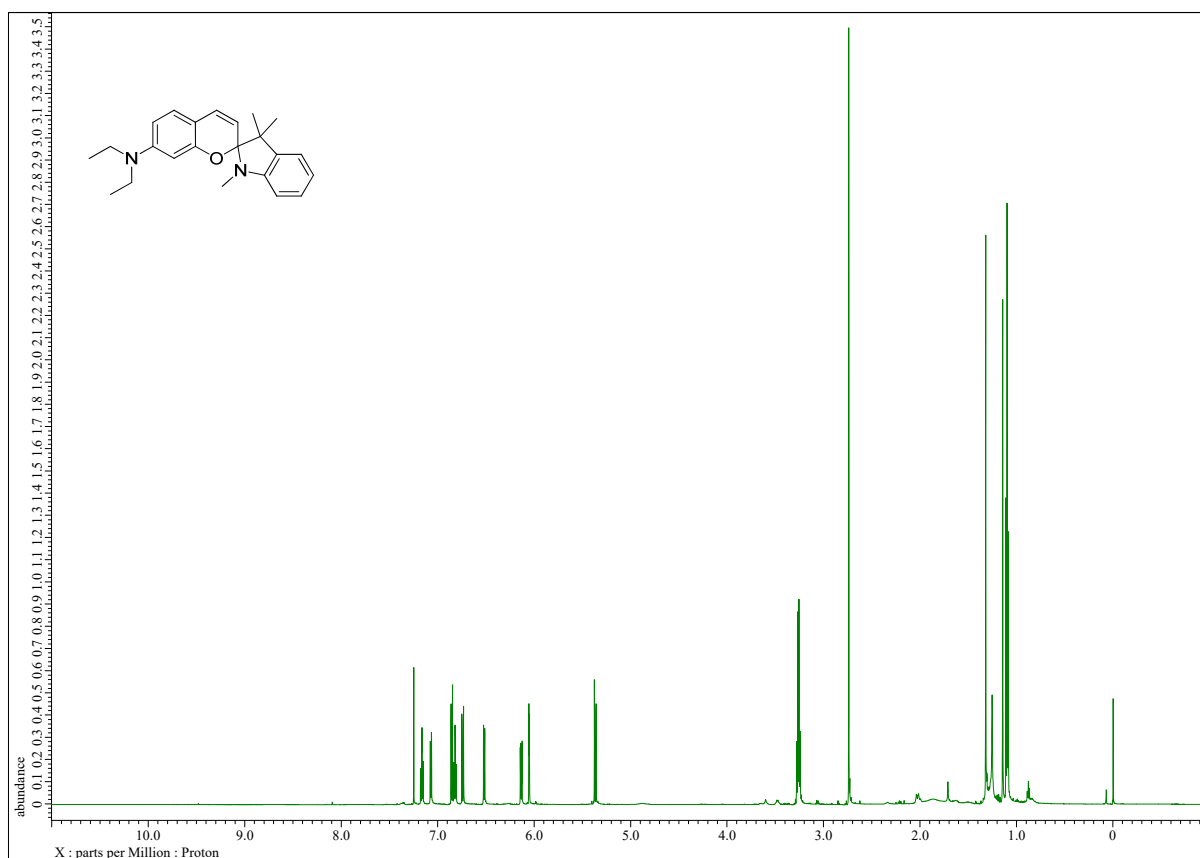

**Figure S10.** <sup>1</sup>H-NMR spectrum (600 MHz) of Dye1 in CDCl<sub>3</sub>.

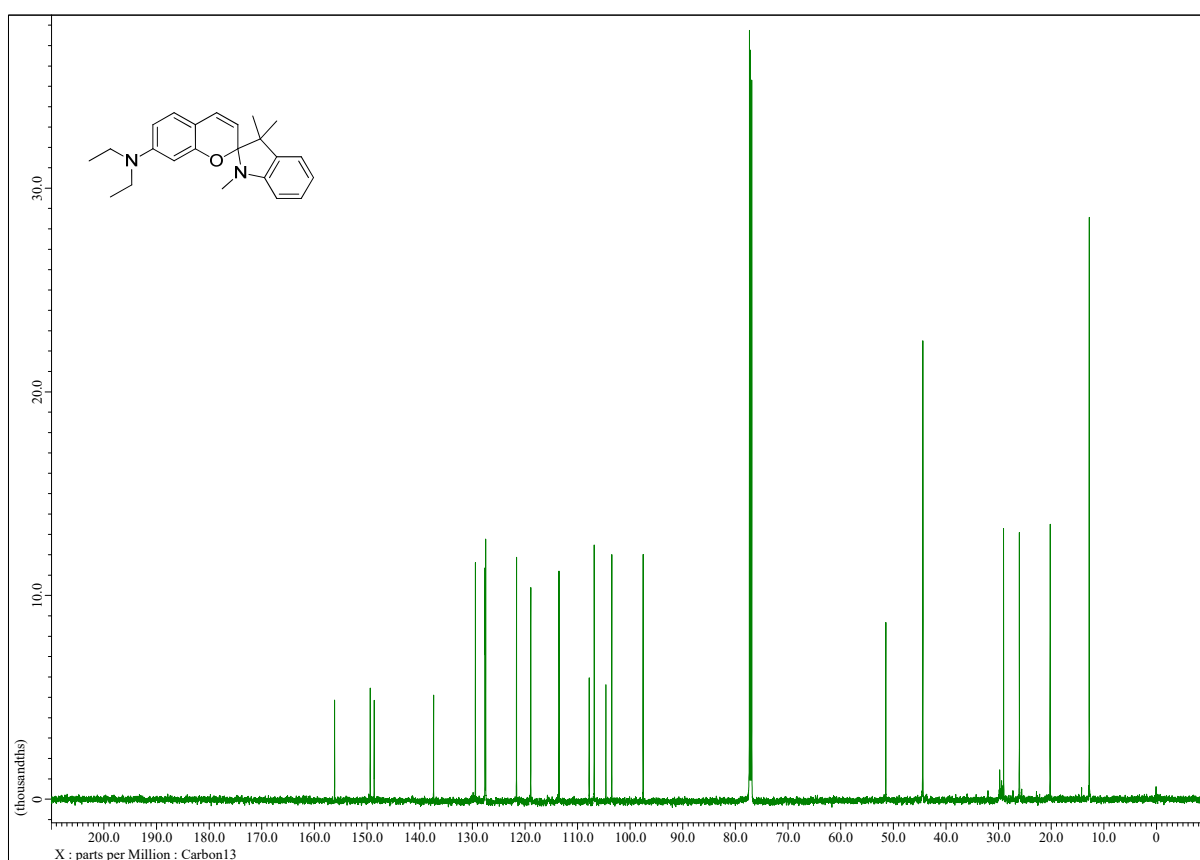

**Figure S11.** <sup>13</sup>C-NMR spectrum (150 MHz) of Dye1 in CDCl<sub>3</sub>.

1 #987-1024 RT: 7.36-7.53 AV: 6 NL: 1.12E8  
F: FTMS + p ESI sid=5.00 Full ms [100.00-1500.00]

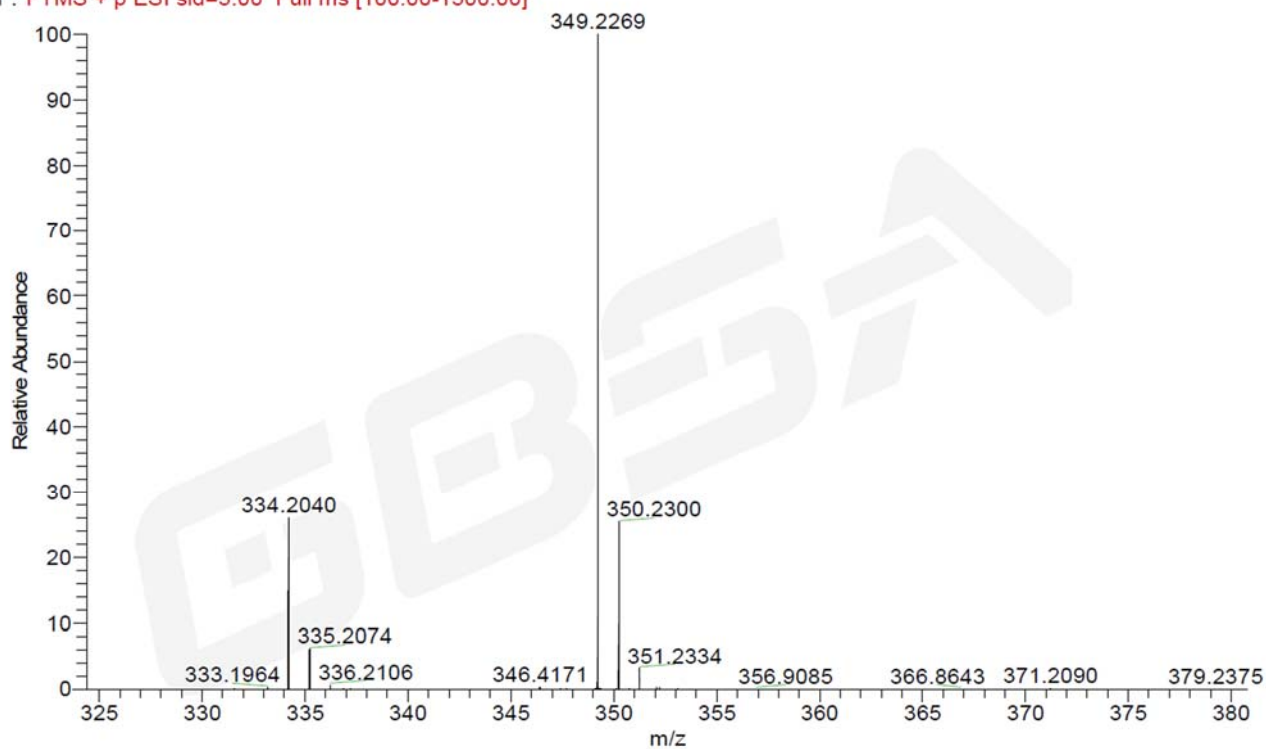

Figure S12. HRMS spectrum of **Dye1**.

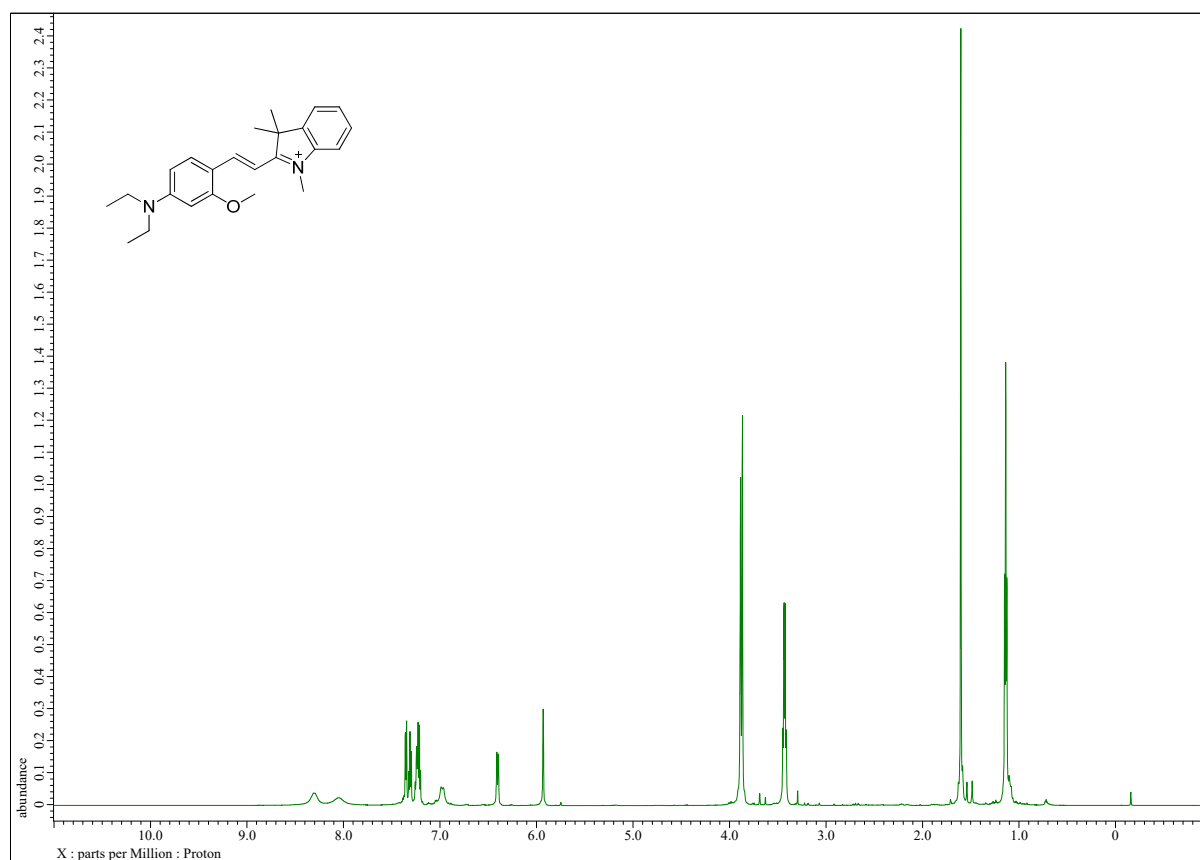

Figure S13. <sup>1</sup>H-NMR spectrum (600 MHz) of **Dye2** in CDCl<sub>3</sub>.

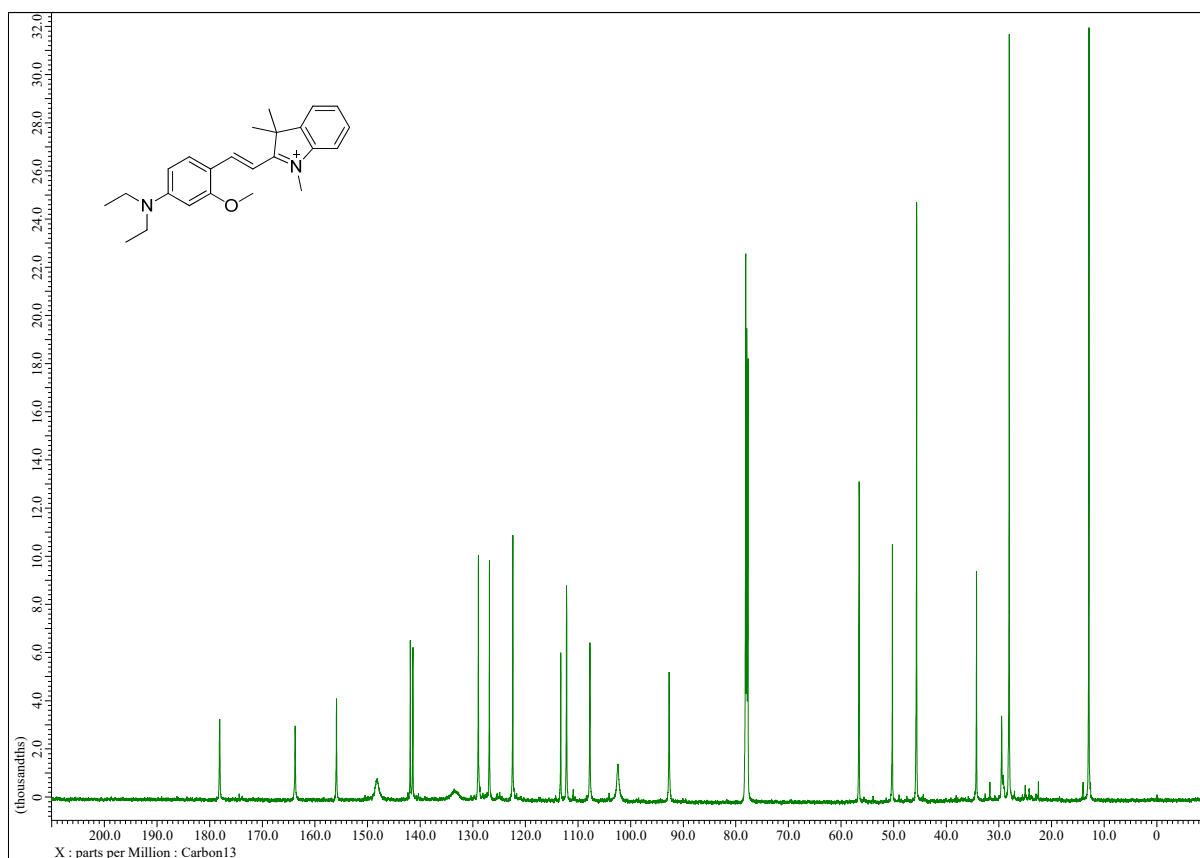

**Figure S14.** <sup>13</sup>C-NMR spectrum (150 MHz) of **Dye2** in CDCl<sub>3</sub>.

2 #1139-1180 RT: 8.16-8.37 AV: 7 NL: 1.30E8  
F: FTMS + p ESI sid=5.00 Full ms [100.00-1500.00]

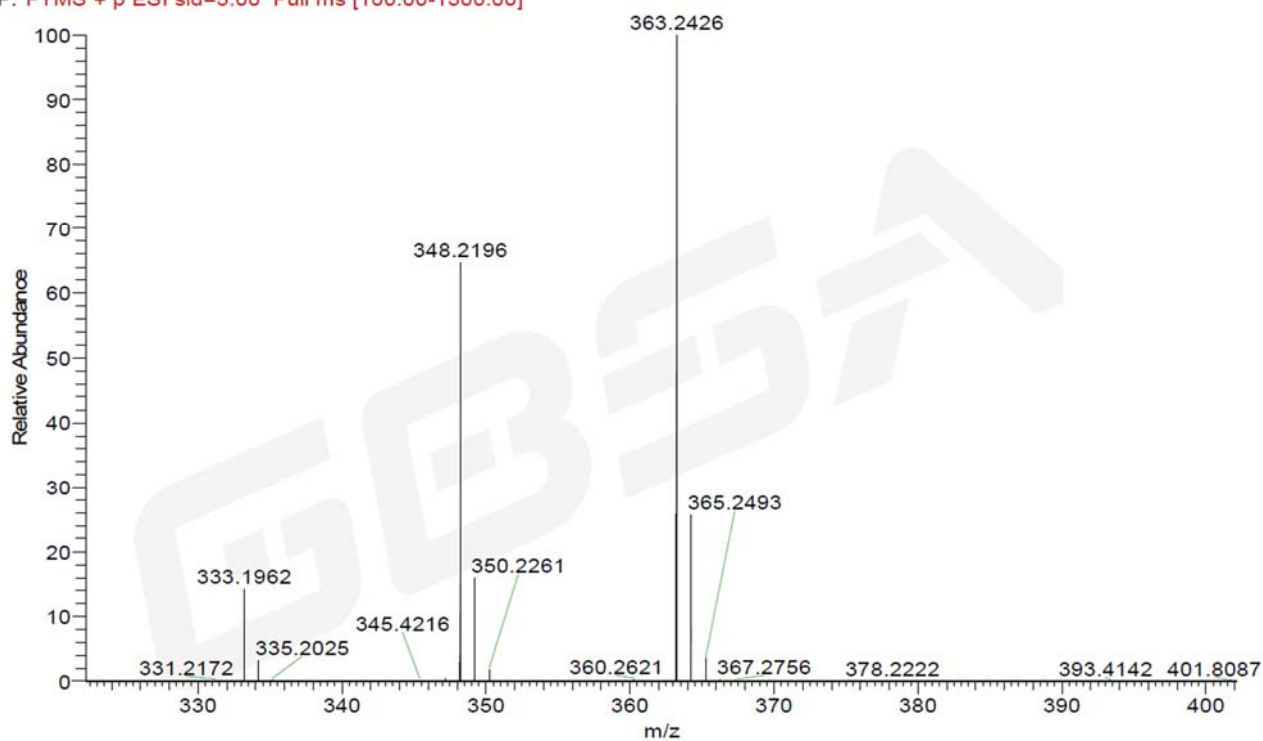

**Figure S15.** HRMS spectrum of **Dye2**.



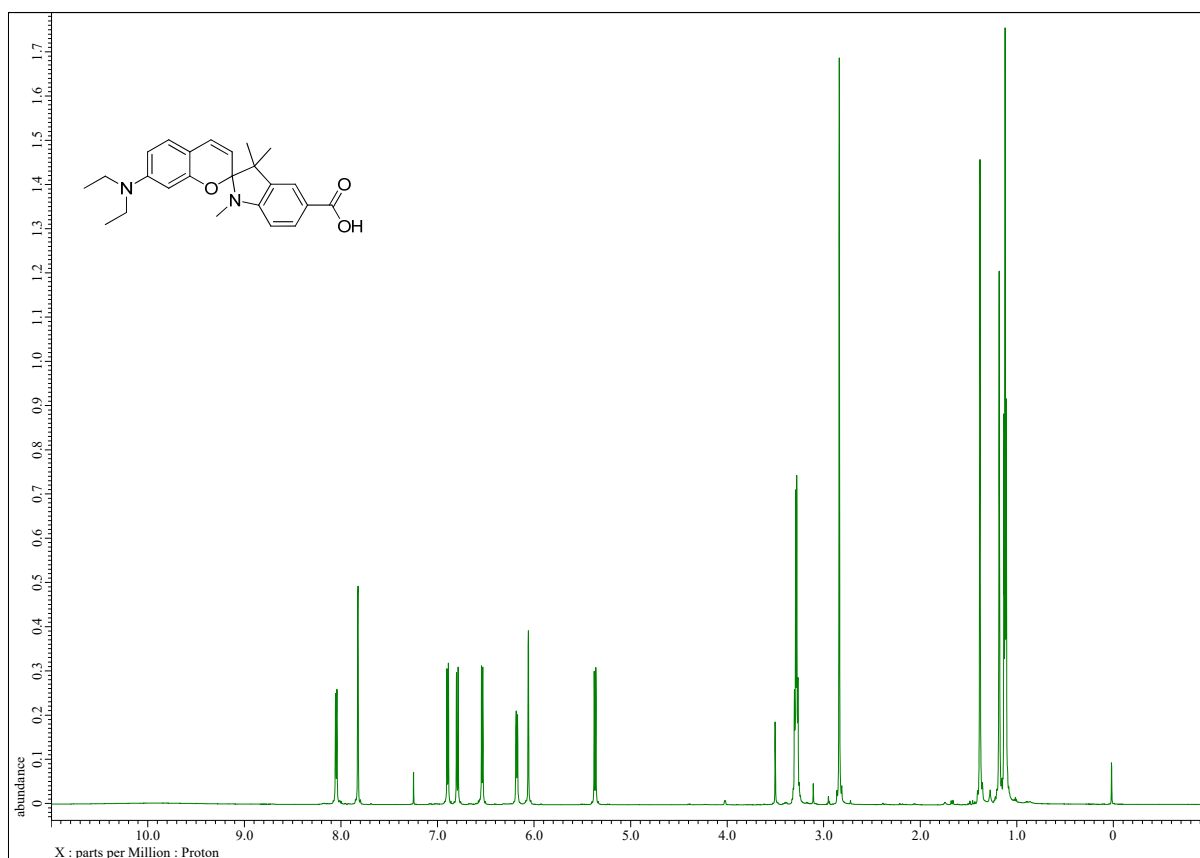

**Figure S16.** <sup>1</sup>H-NMR spectrum (600 MHz) of **4** in CDCl<sub>3</sub>.

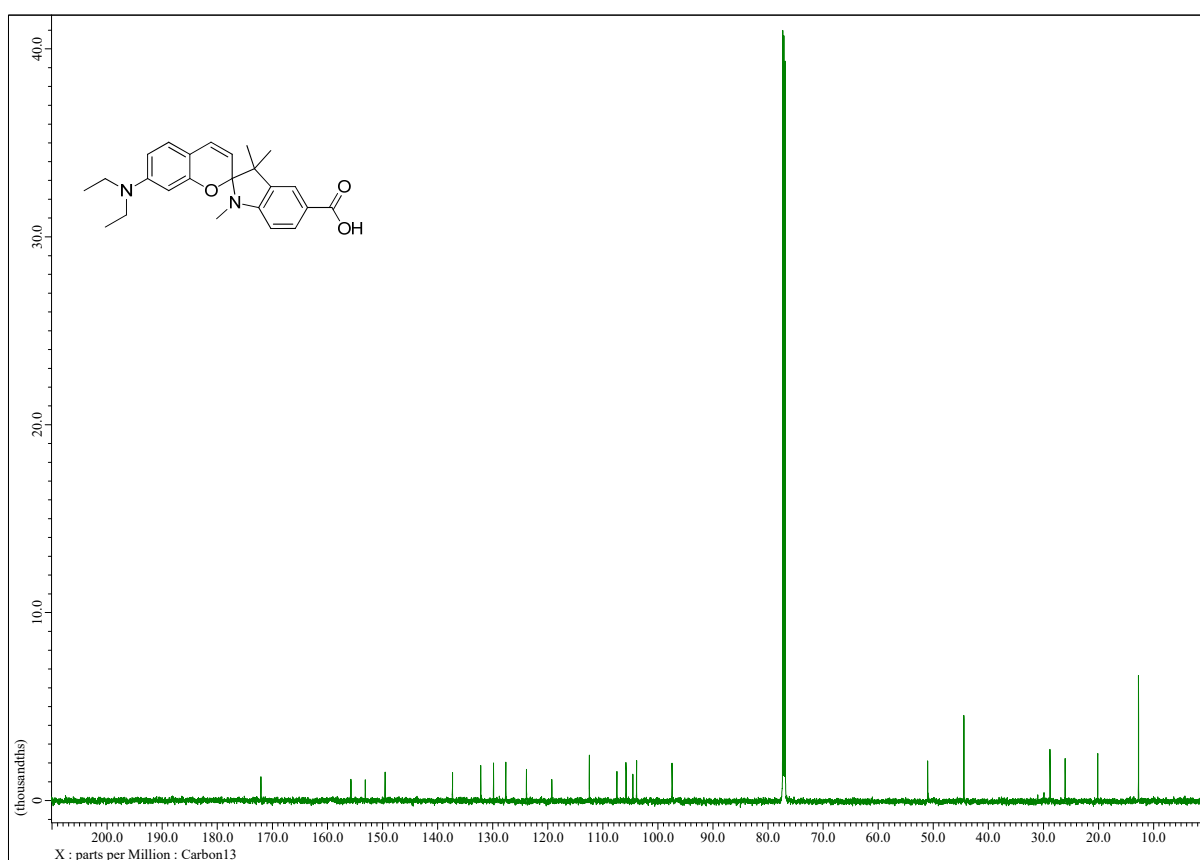

**Figure S17.** <sup>13</sup>C-NMR spectrum (150 MHz) of **4** in CDCl<sub>3</sub>.

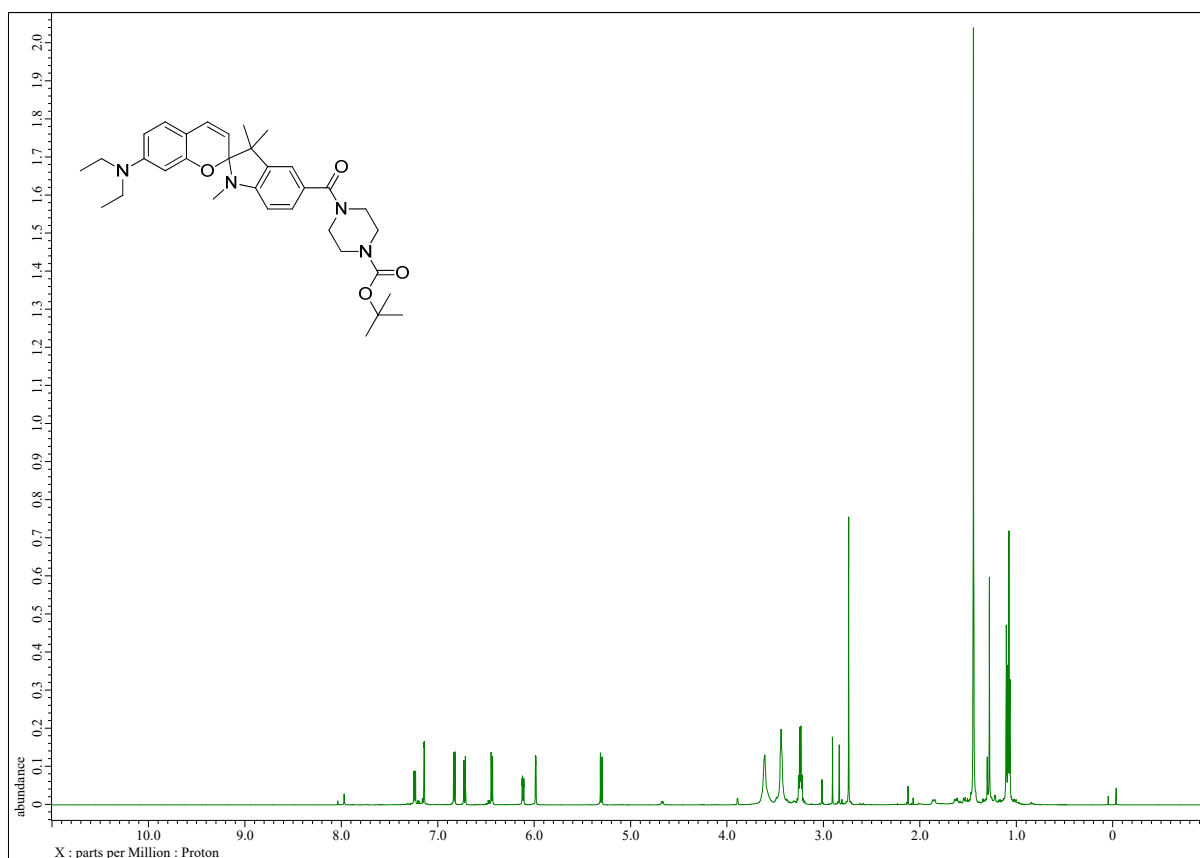

**Figure S18.** <sup>1</sup>H-NMR spectrum (600 MHz) of **6** in CDCl<sub>3</sub>.

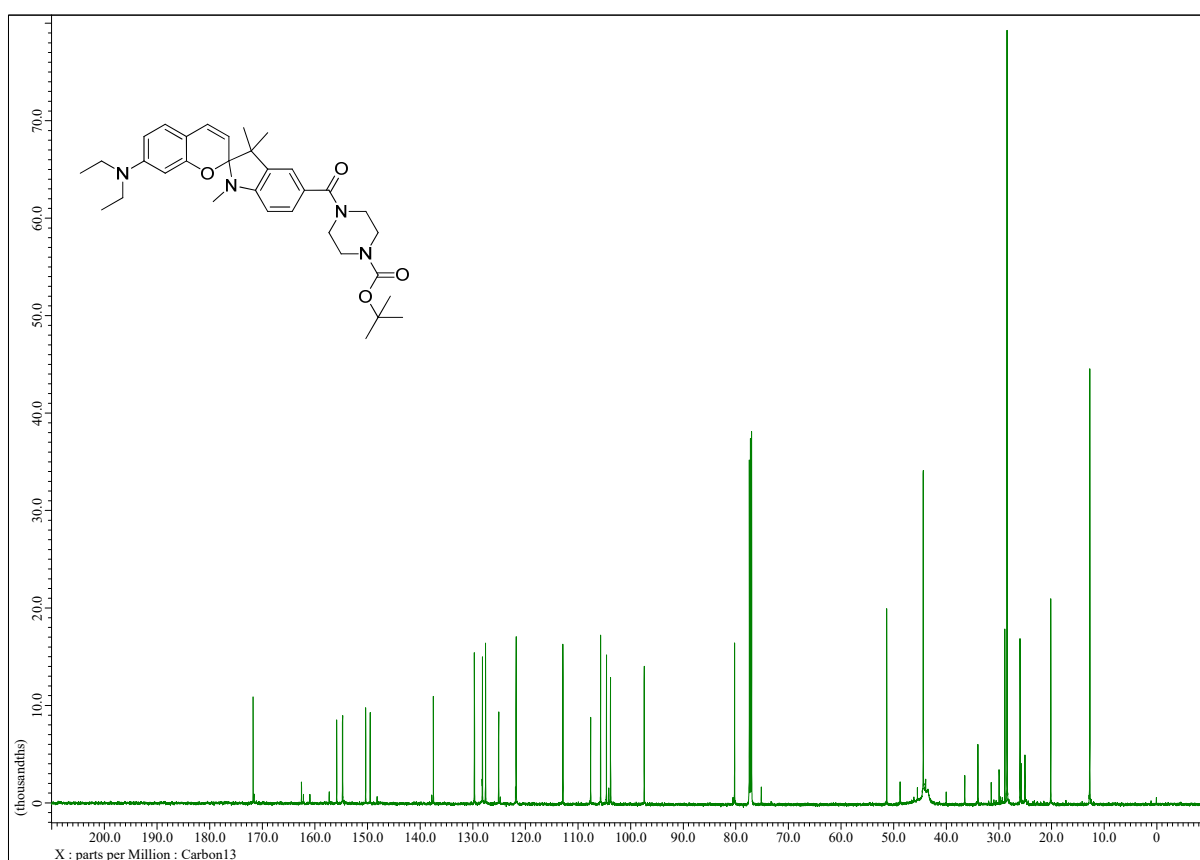

**Figure S19.** <sup>13</sup>C-NMR spectrum (150 MHz) of **6** in CDCl<sub>3</sub>.

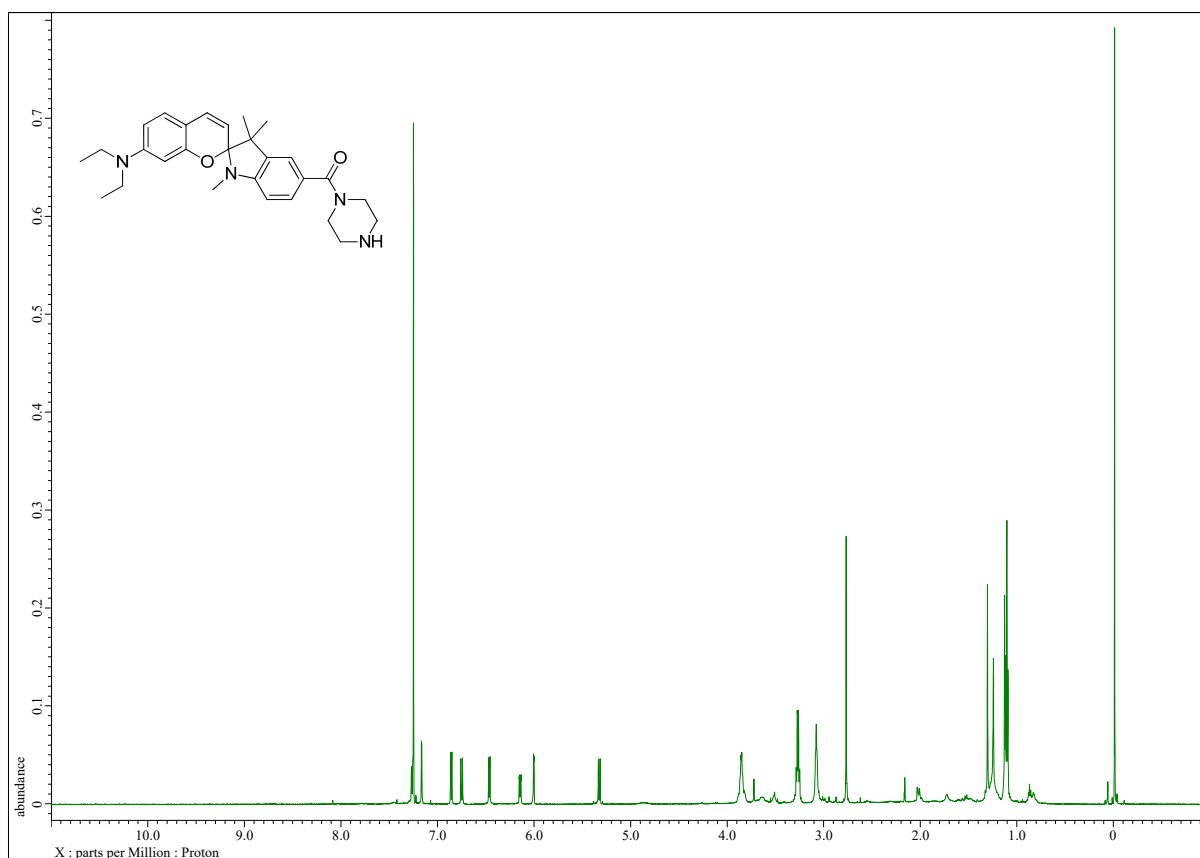

**Figure S20.** <sup>1</sup>H-NMR spectrum (600 MHz) of 7 in CDCl<sub>3</sub>.

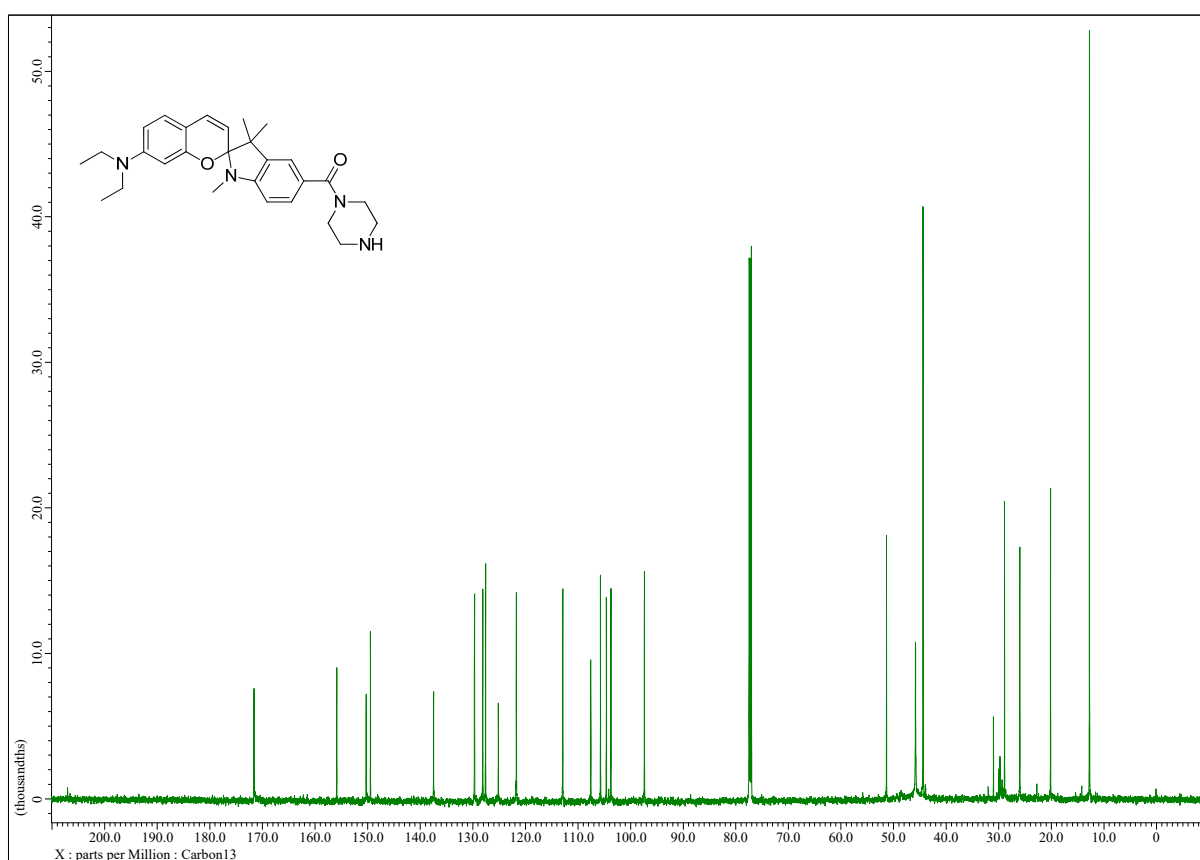

**Figure S21.** <sup>13</sup>C-NMR spectrum (150 MHz) of 7 in CDCl<sub>3</sub>.

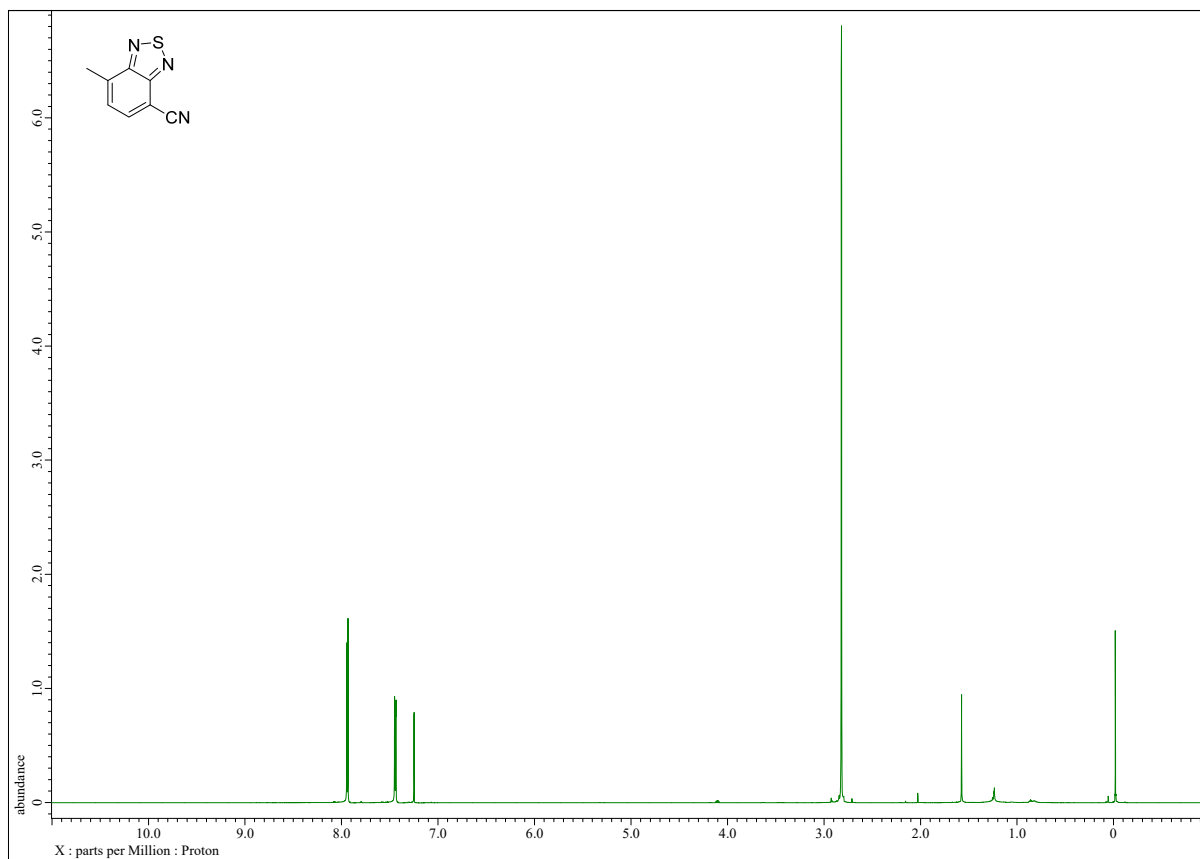

**Figure S22.** <sup>1</sup>H-NMR spectrum (600 MHz) of **9** in CDCl<sub>3</sub>.

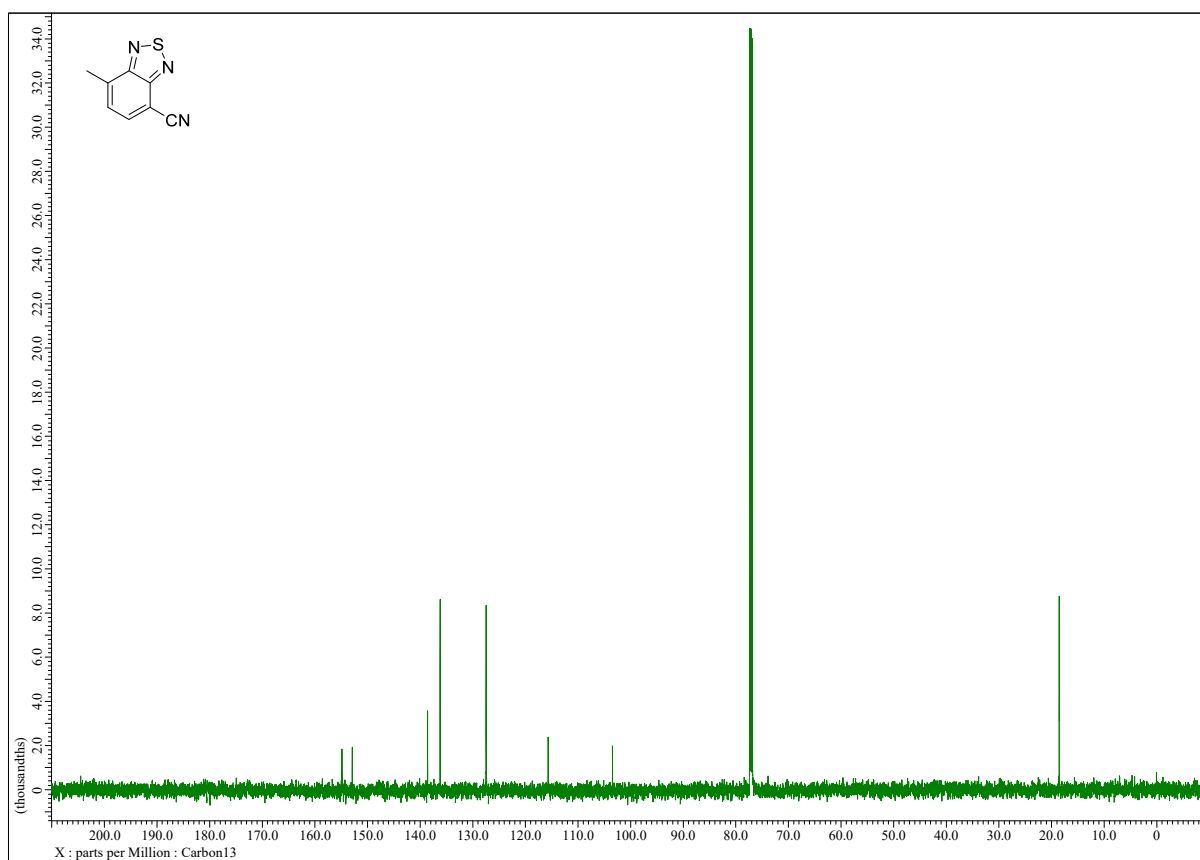

**Figure S23.** <sup>13</sup>C-NMR spectrum (150 MHz) of **9** in CDCl<sub>3</sub>.

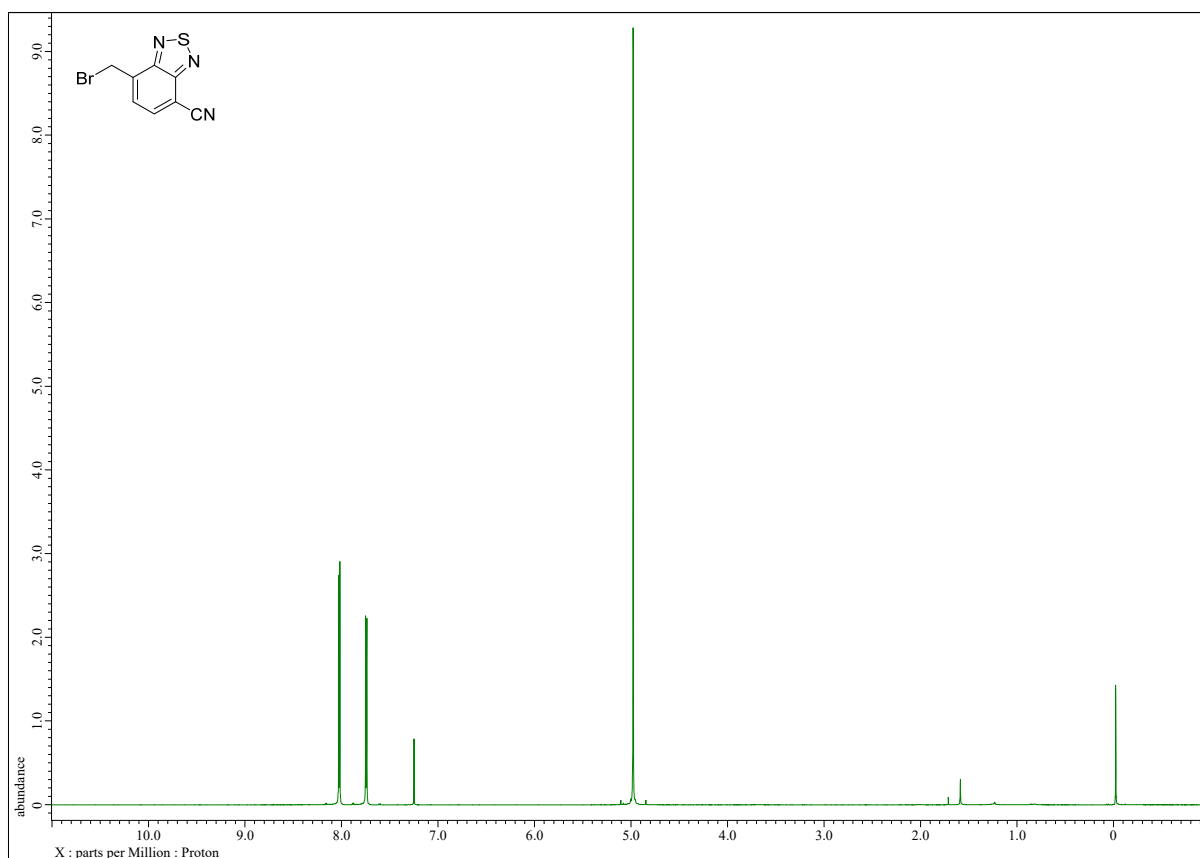

**Figure S24.** <sup>1</sup>H-NMR spectrum (600 MHz) of **10** in CDCl<sub>3</sub>.

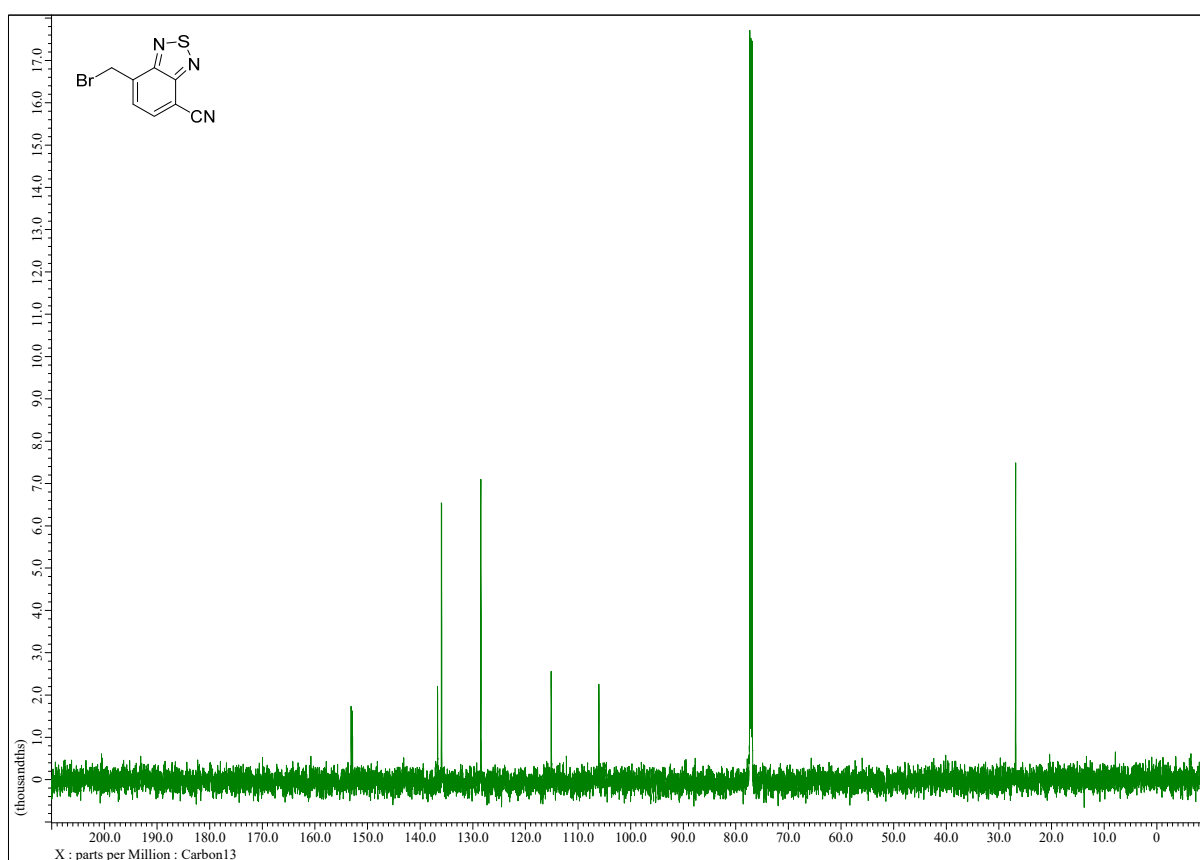

**Figure S25.** <sup>13</sup>C-NMR spectrum (150 MHz) of **10** in CDCl<sub>3</sub>.

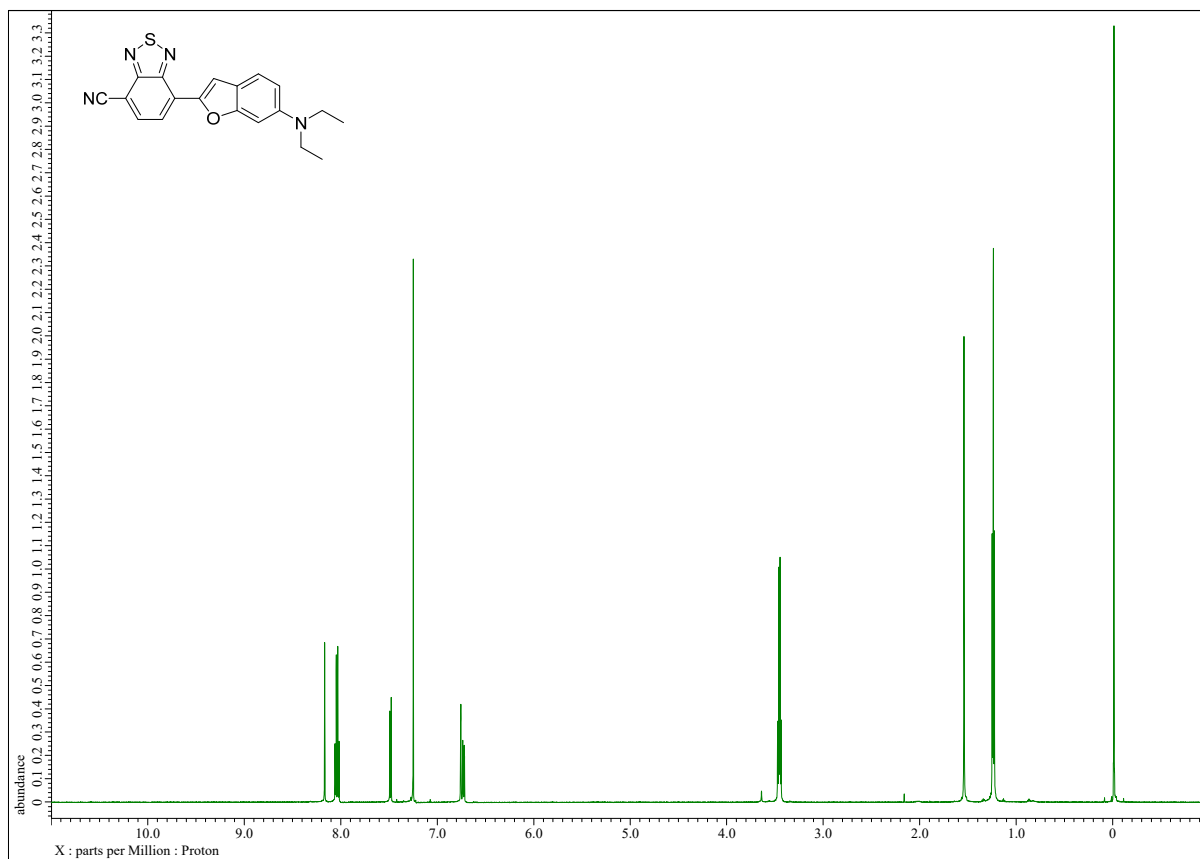

**Figure S26.** <sup>1</sup>H-NMR spectrum (600 MHz) of **11** in CDCl<sub>3</sub>.

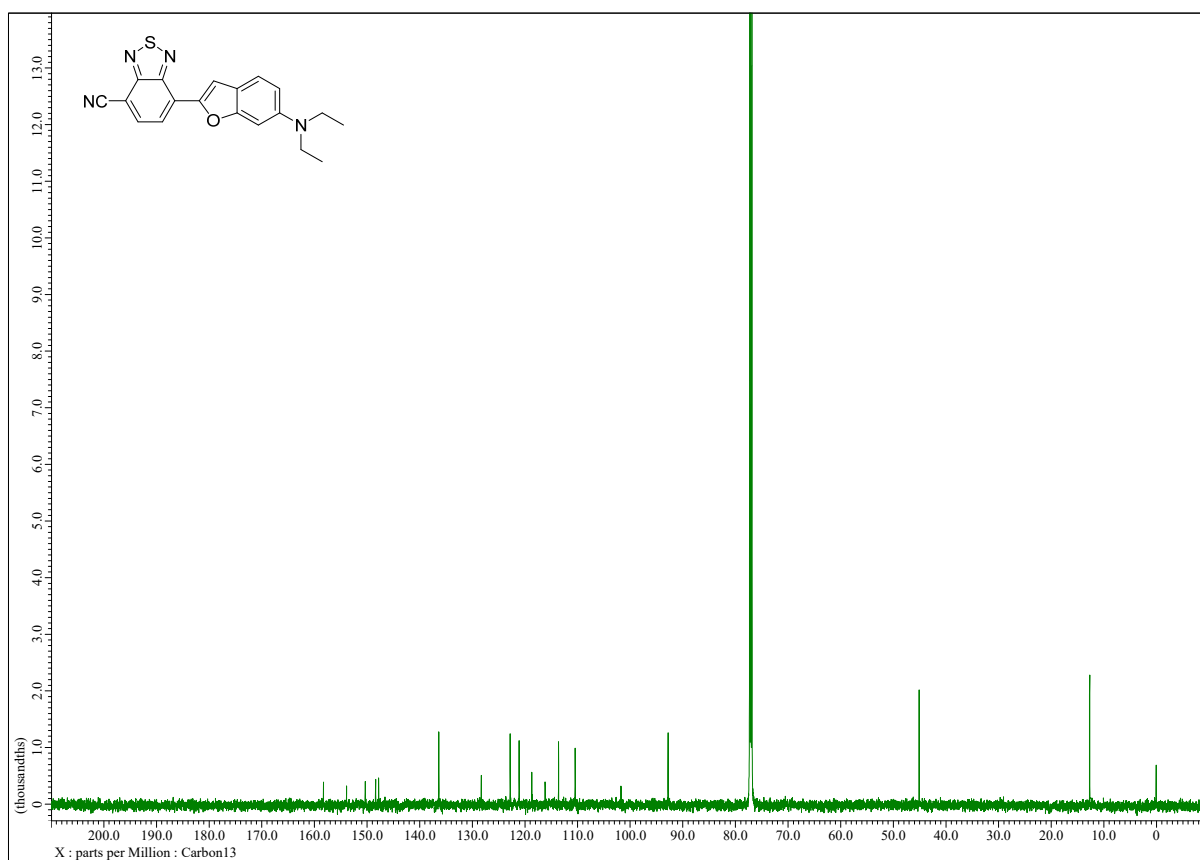

**Figure S27.** <sup>13</sup>C-NMR spectrum (150 MHz) of **11** in CDCl<sub>3</sub>.

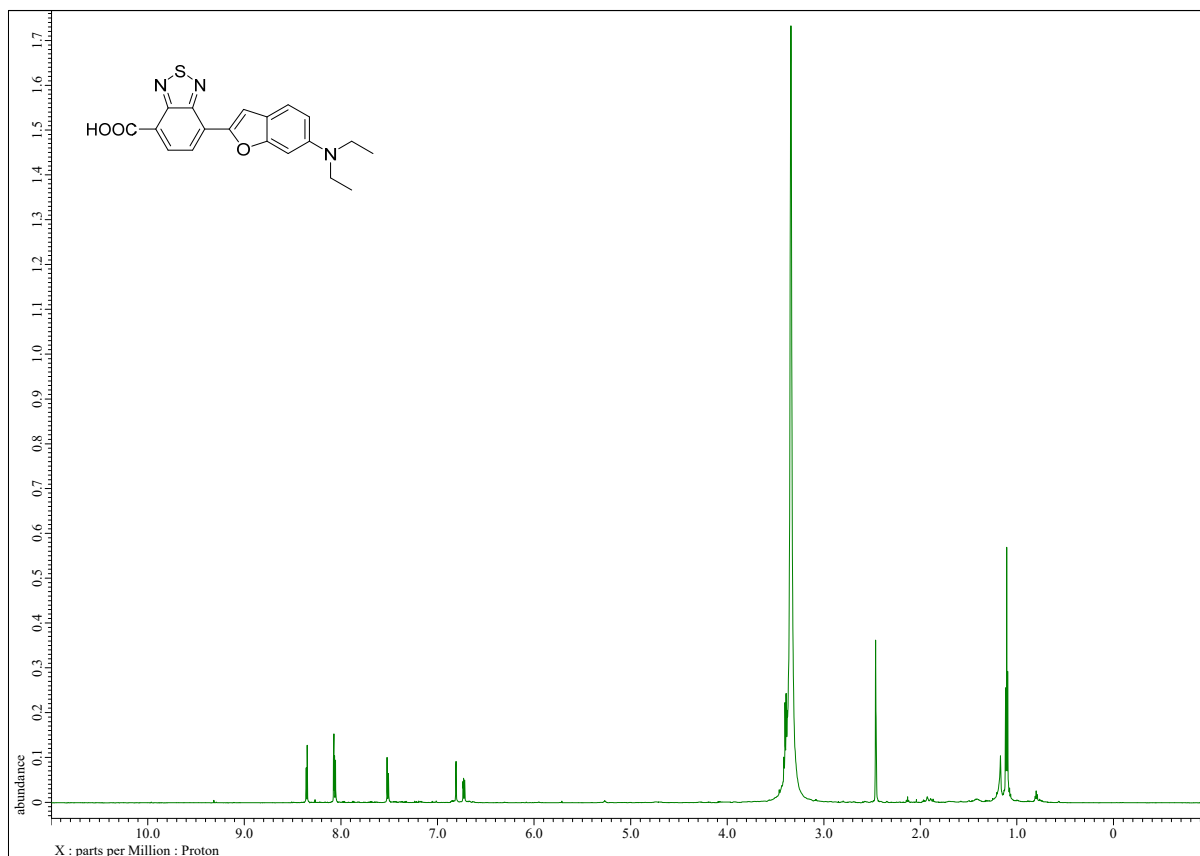

**Figure S28.** <sup>1</sup>H-NMR spectrum (600 MHz) of **Dye3** in DMSO.

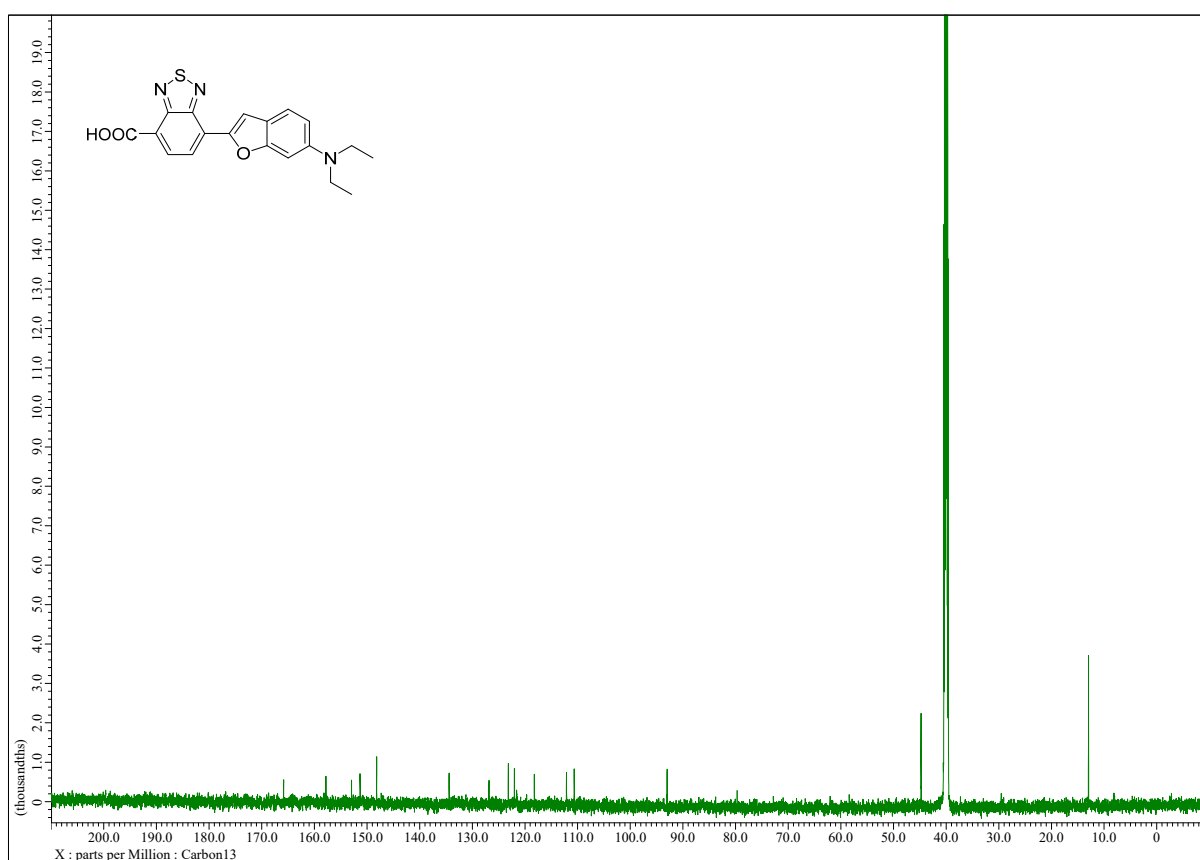

**Figure S29.** <sup>13</sup>C-NMR spectrum (150 MHz) of **Dye3** in DMSO.

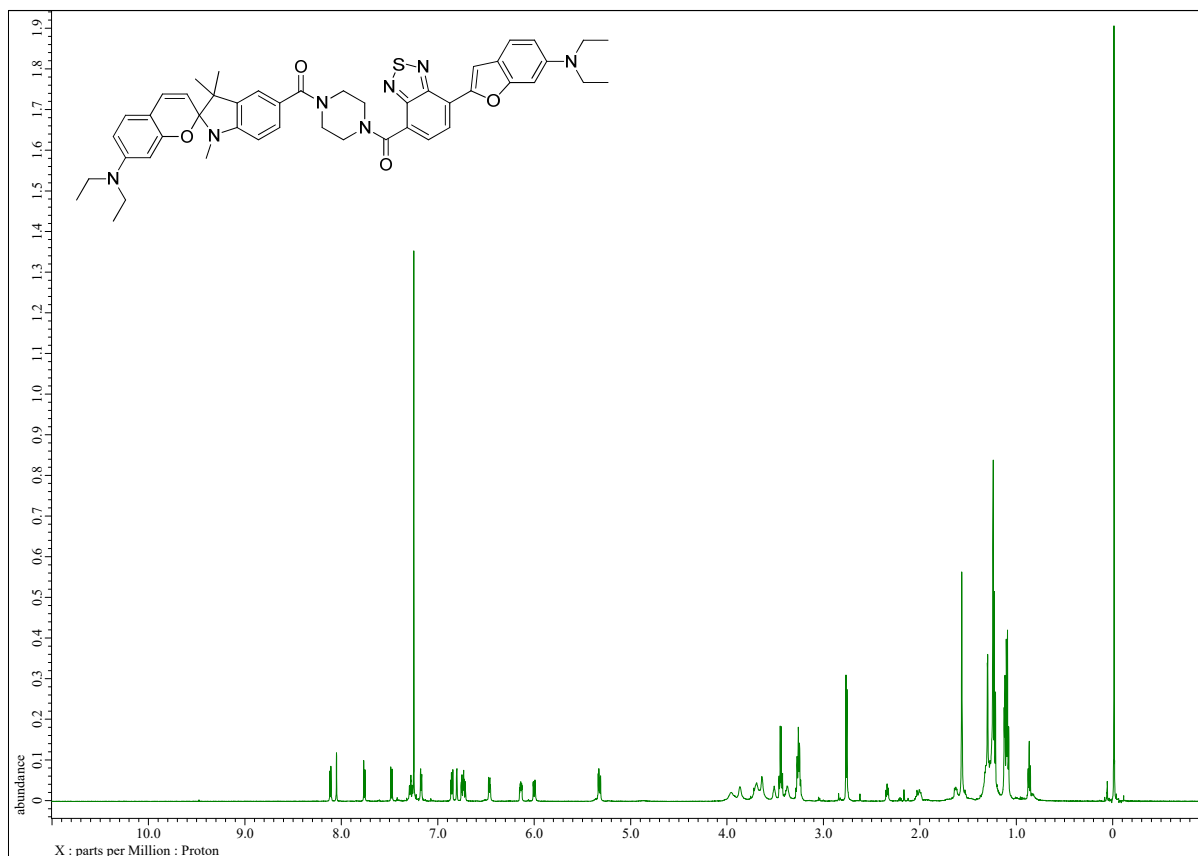

**Figure S30.**  $^1\text{H}$ -NMR spectrum (600 MHz) of **RPS-1** in  $\text{CDCl}_3$ .

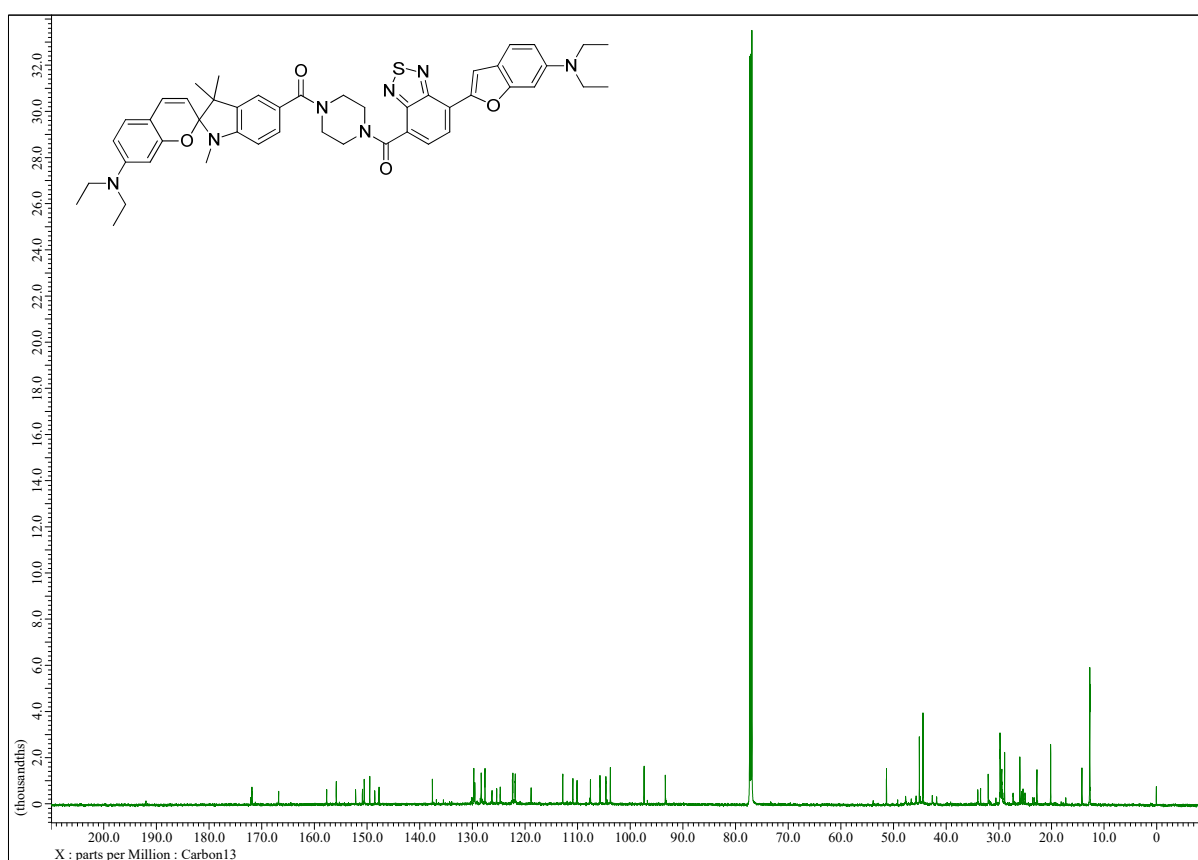

**Figure S31.**  $^{13}\text{C}$ -NMR spectrum (150 MHz) of **RPS-1** in  $\text{CDCl}_3$ .



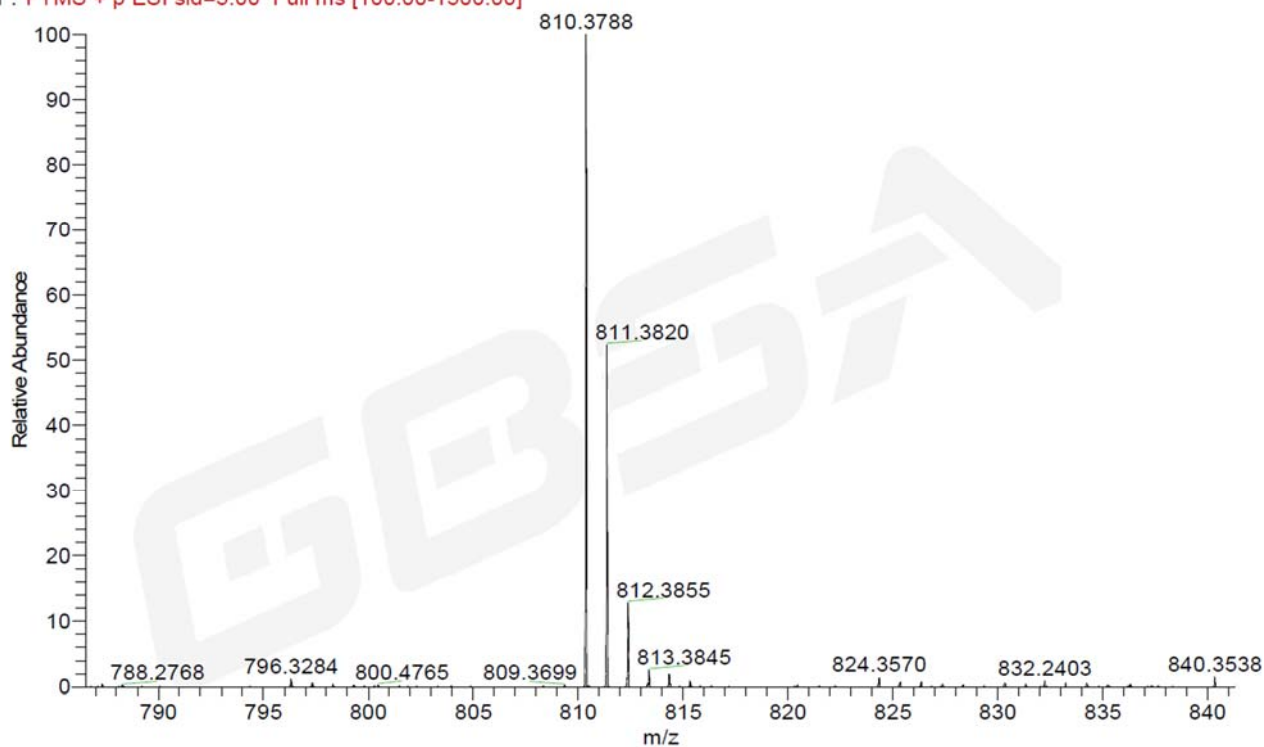

**Figure S32.** HRMS spectrum of **RPS-1**.

## References

- (1) X. Song, H. Bian, C. Wang, M. Hu, N. Li and Y. Xiao, *Org. biomol. Chem.*, 2017, **15**, 8091–8101.
- (2) P. Chou, C. Huang, S. Pu, Y. Cheng, Y. Liu, Y. Wang, and C. Chen, *J. Phys. Chem. A*, 2004, **108**, 6452–6454.
- (3) A. Nano, A. N. Boynton and J. K. Barton, *J. Am. Chem. Soc.*, 2017, **139**, 17301–17304.
- (4) B. Biannic and J. J. Bozell, *Org. Lett.*, 2013, **15**, 2730–2733.
- (5) R. Agneeswari, V. Tamilavan, M. Song and M. H. Hyun, *J. Mater. Chem. C*, 2014, **2**, 8515–8524.
- (6) M. Uesugi, T. Hayashi and H. E. Jasin, *J. Immunol.* 1998, **161**, 1422–1427.
